# Supplementary material for: Antimicrobial Activity of Rhenium Di- and Tricarbonyl Diimine Complexes: Insights on Membrane-Bound S. aureus Protein Binding
Source: MDPI journal article supplement (doi:10.3390/ph15091107), 2022-09-05
Supplement: s1 [file s1]

Article

## Supporting Information for:

# Antimicrobial Activity of Rhenium Di- and Tricarbonyl Diimine Complexes: Insights on Membrane-Bound *S. aureus* Proteins Binding

Kevin Schindler <sup>1,†</sup>, Youri Cortat <sup>1,†</sup>, Miroslava Nedyalkova <sup>1</sup>, Aurélien Crochet <sup>1</sup>, Marco Lattuada <sup>1</sup>, Aleksandar Pavic <sup>2,\*</sup> and Fabio Zobi <sup>1,\*</sup>

<sup>1</sup> Department of Chemistry, Fribourg University, Chemin Du Musée 9, 1700 Fribourg, Switzerland

<sup>2</sup> Institute of Molecular Genetics and Genetic Engineering, University of Belgrade, Vojvode Stepe 444a, 11042 Belgrade, Serbia

\* Correspondence: sasapavic@imgge.bg.ac.rs (A.P.); fabio.zobi@unifr.ch (F.Z.)

† These authors contributed equally to this paper

## Table of contents

<sup>1</sup>H-NMR spectra of compounds—**Figures S1–S8**

IR spectra (solid state) of compounds—**Figure S9**

UV-Vis spectra (in DMF) of compounds—**Figures S10**

*In silico* pre-screening of binding affinities (b.a.; docking scores. kcal/mol) of rhenium complexes against structurally characterized membrane bound *S. aureus* proteins: Penicillin Binding Proteins (PBPs).—**Table S1a**

*In silico* pre-screening of binding affinities (b.a.; docking scores. kcal/mol) of non-toxic complexes against other structurally characterized membrane bound *S. aureus* proteins.—**Table S1b**

Visualisation of surface protein surface polarity (A) non-polar to polar SASA colour-coded from low NPP ratio (purple) to high NPP ratio (green), and in (B) colour-coded from negative charge (red) to positive charge (blue). Regions of high hydrophobicity are coloured green, low hydrophobicity coloured purple.—**Figure S11**

Pockets prediction—mapping the ranking with residues environment distribution—**Table S2**

Binding orientation of the compounds with hydrogen-acceptor and hydrogen-donor distances: A. **15** and PBP2 : 2OLV ; B. **19** and PBP2a : 4DKI ; C. **15** and PBP3: 3VSL; D. **19** and PBP4: 5TXI.—**Figures S12a**

Binding orientation of the compounds with hydrogen-acceptor and hydrogen-donor distances: A. **18** and Lipoteichoic acids synthase (LtaS): 2W5Q; B. **15** and Type-I signal peptidase (SpsB): 4WVJ; C. **19** and Lipoteichoic acids flippase (LtaA): 6S7V; D. **19** and Lipoprotein signal peptidase II (LspA): 6RYP.—**Figures S12b**

Percentage distribution of the surrounding residue types for the two groups of protein.—**Table S3**

Selected Bond Lengths for complexes.—Table S4a–S4i

Selected Bond Angles for complexes.—Table S4a'–S4i'

References—page 24

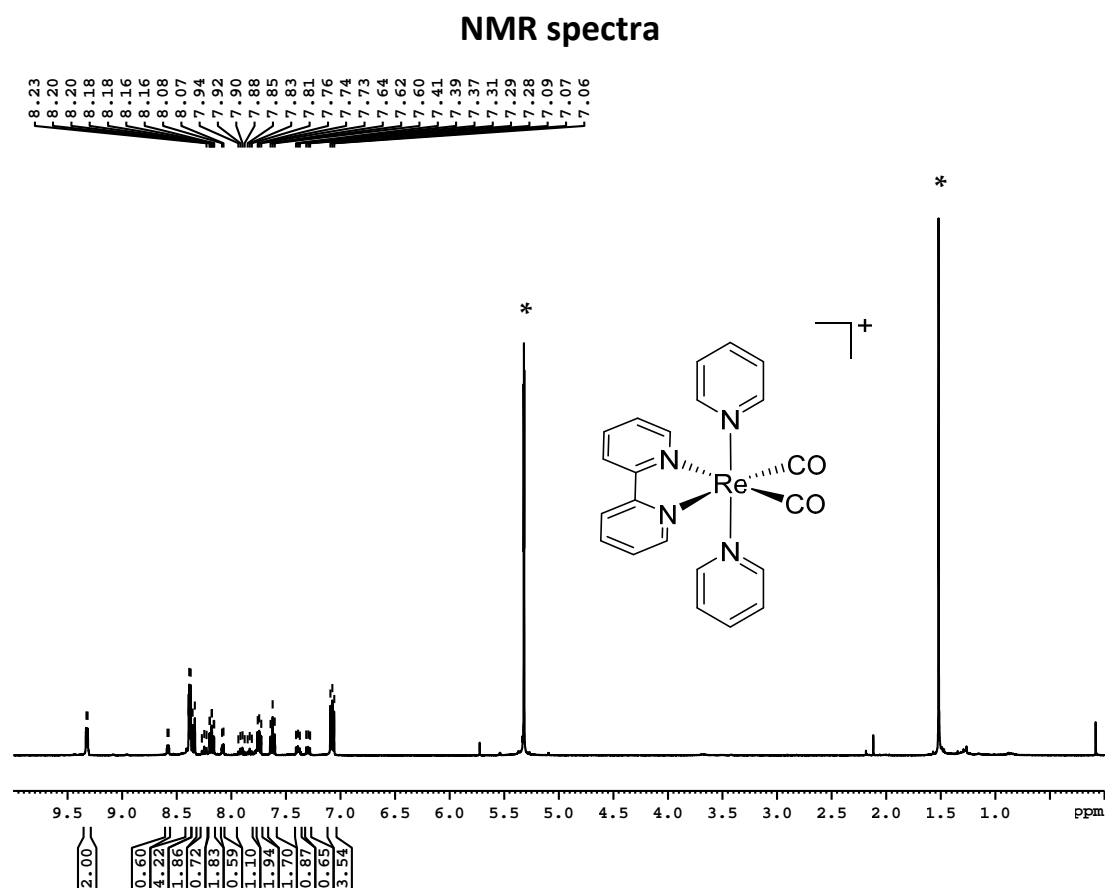

**Figure S1.** <sup>1</sup>H NMR spectrum of **4a** in CD<sub>2</sub>Cl<sub>2</sub>, \* = solvent residual peak (DCM, H<sub>2</sub>O).

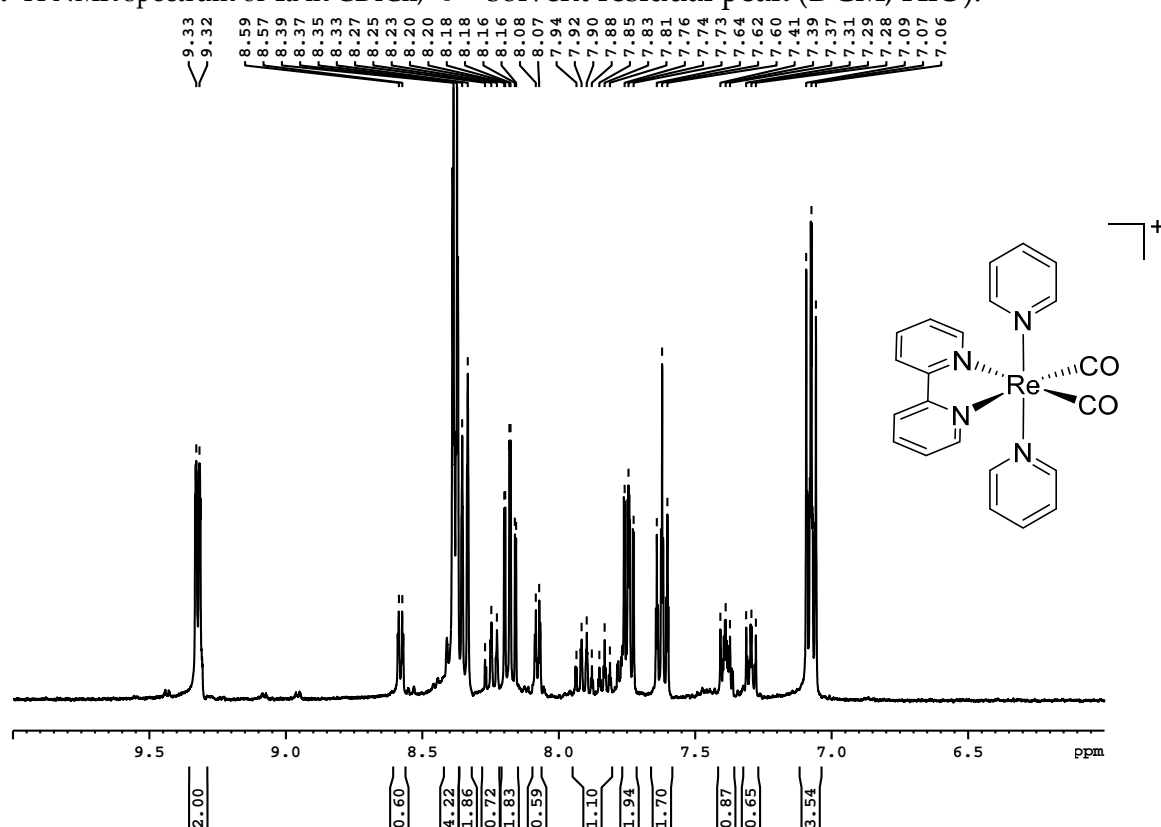

**Figure S1a.** <sup>1</sup>H NMR spectrum of aromatic region of **4a** in CD<sub>2</sub>Cl<sub>2</sub>. Small residual peaks are of the *cis*-isomers.

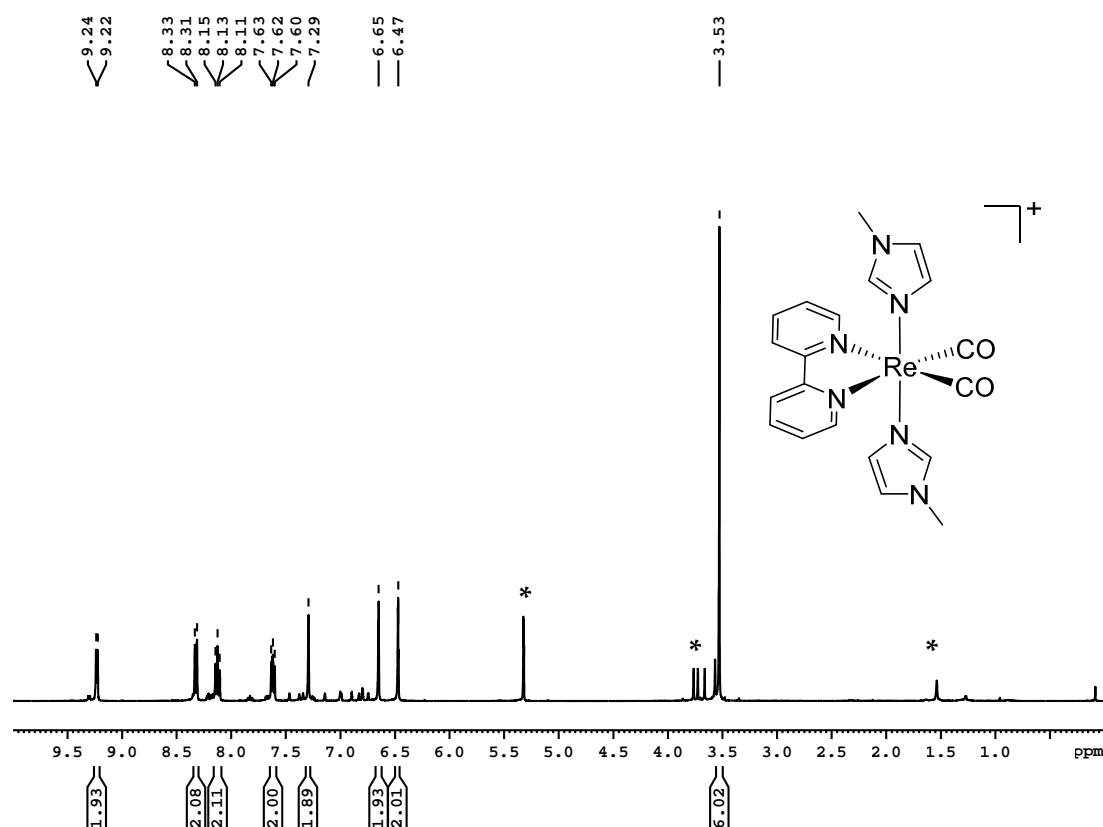

**Figure S2.**  $^1\text{H}$  NMR spectrum of **5a** in  $\text{CD}_2\text{Cl}_2$ , \* = solvent residual peak (DCM,  $\text{H}_2\text{O}$ , MeIm).

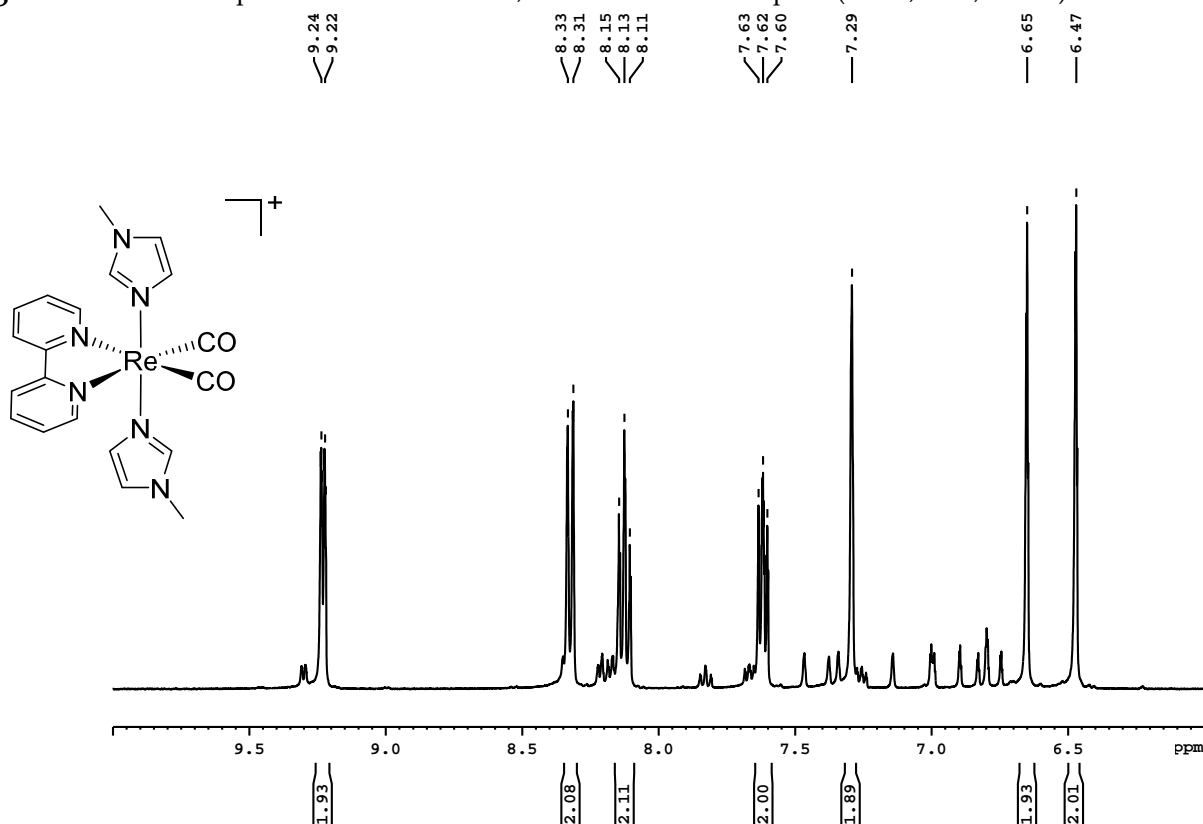

**Figure S2a.**  $^1\text{H}$  NMR spectrum of aromatic region of **5a** in  $\text{CD}_2\text{Cl}_2$ . Small residual peaks are of the *cis*-isomers.

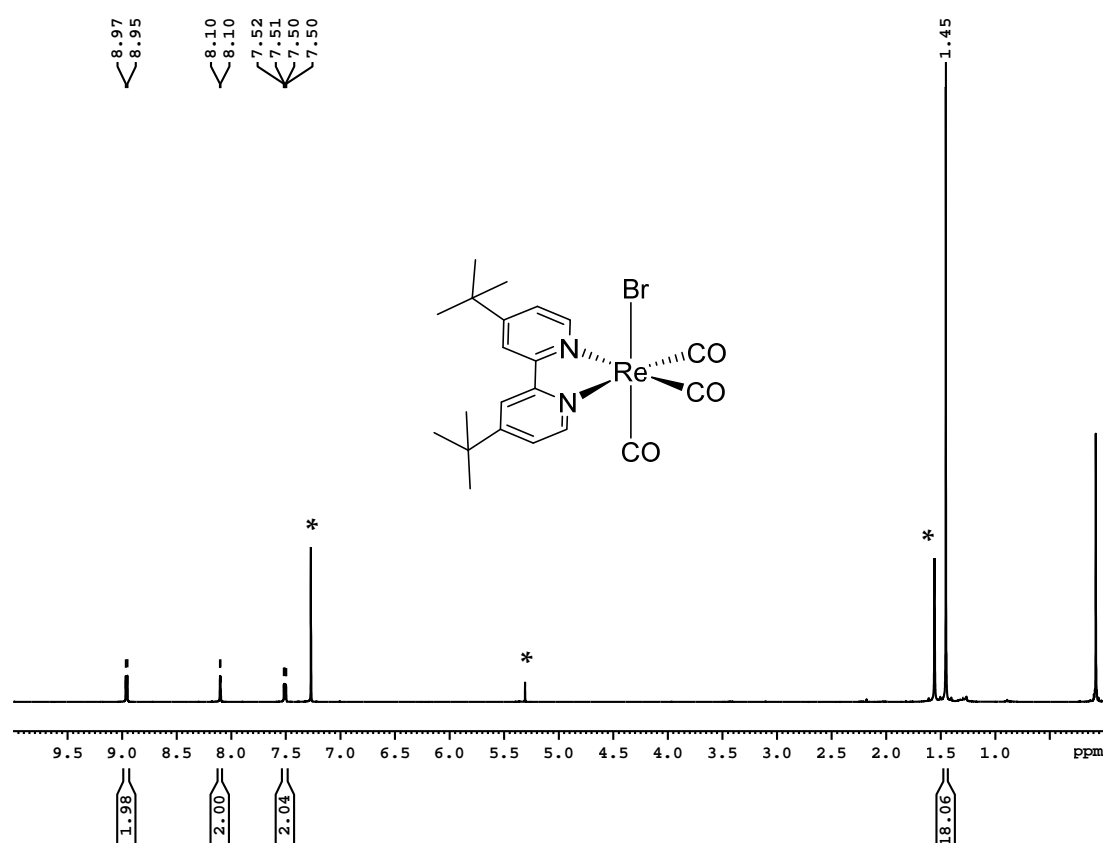

**Figure S3.** <sup>1</sup>H NMR spectrum of **6** in CDCl<sub>3</sub>, \* = solvent residual peak (CHCl<sub>3</sub>, H<sub>2</sub>O, DCM).

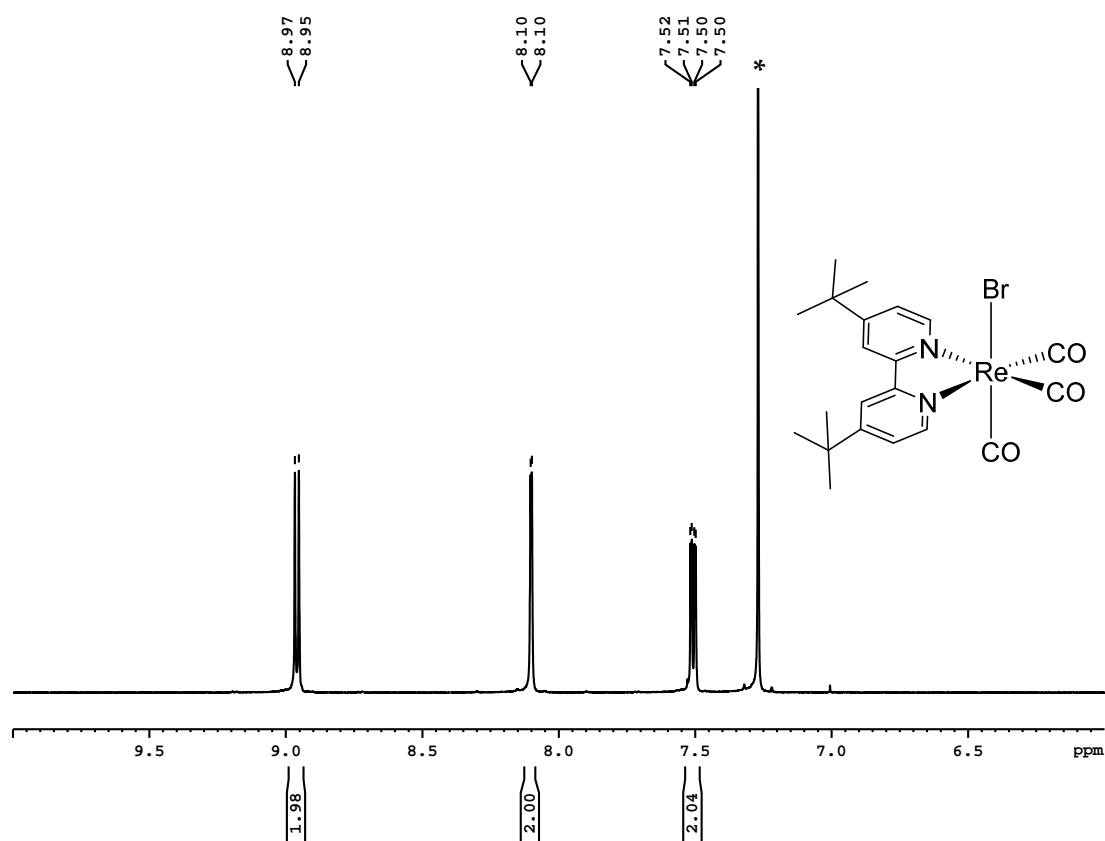

**Figure S3a.** <sup>1</sup>H NMR spectrum of aromatic region of **6** in CDCl<sub>3</sub> (zoom), \* = solvent residual peak (CHCl<sub>3</sub>).

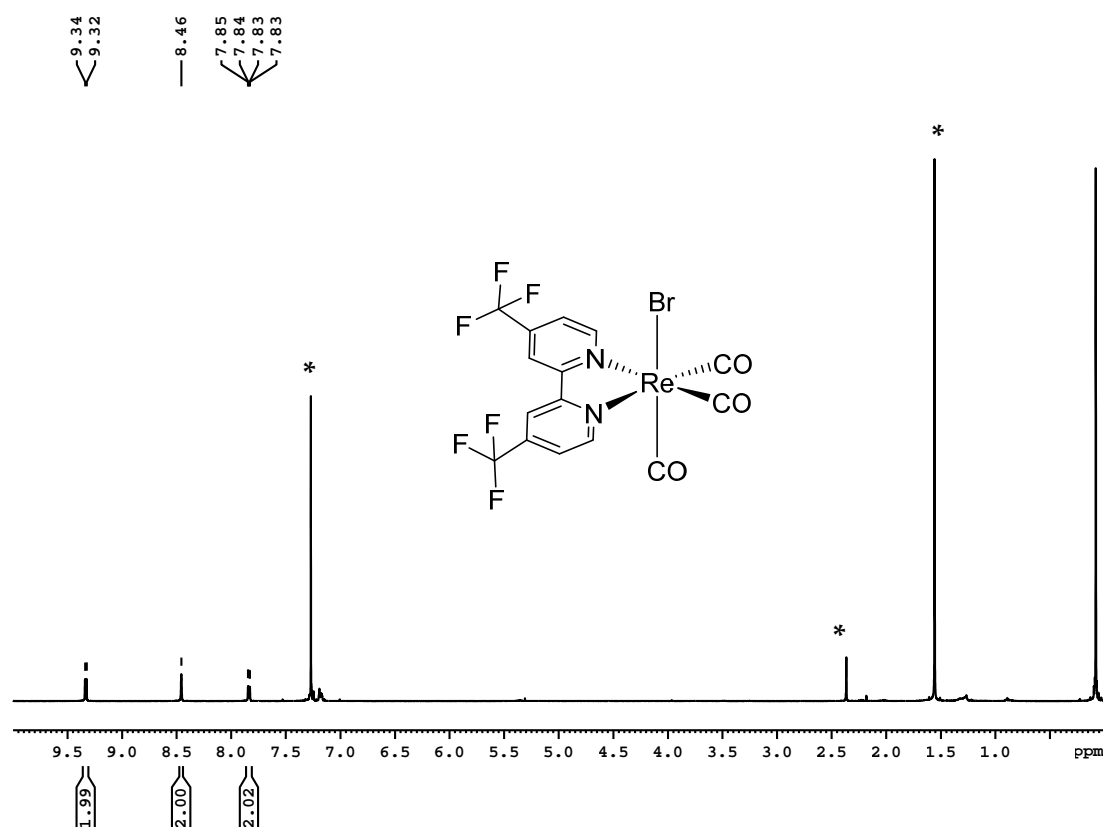

**Figure S4.**  $^1\text{H}$  NMR spectrum of **7** in  $\text{CDCl}_3$ , \* = solvent residual peak ( $\text{CHCl}_3$ ,  $\text{H}_2\text{O}$ , Tol).

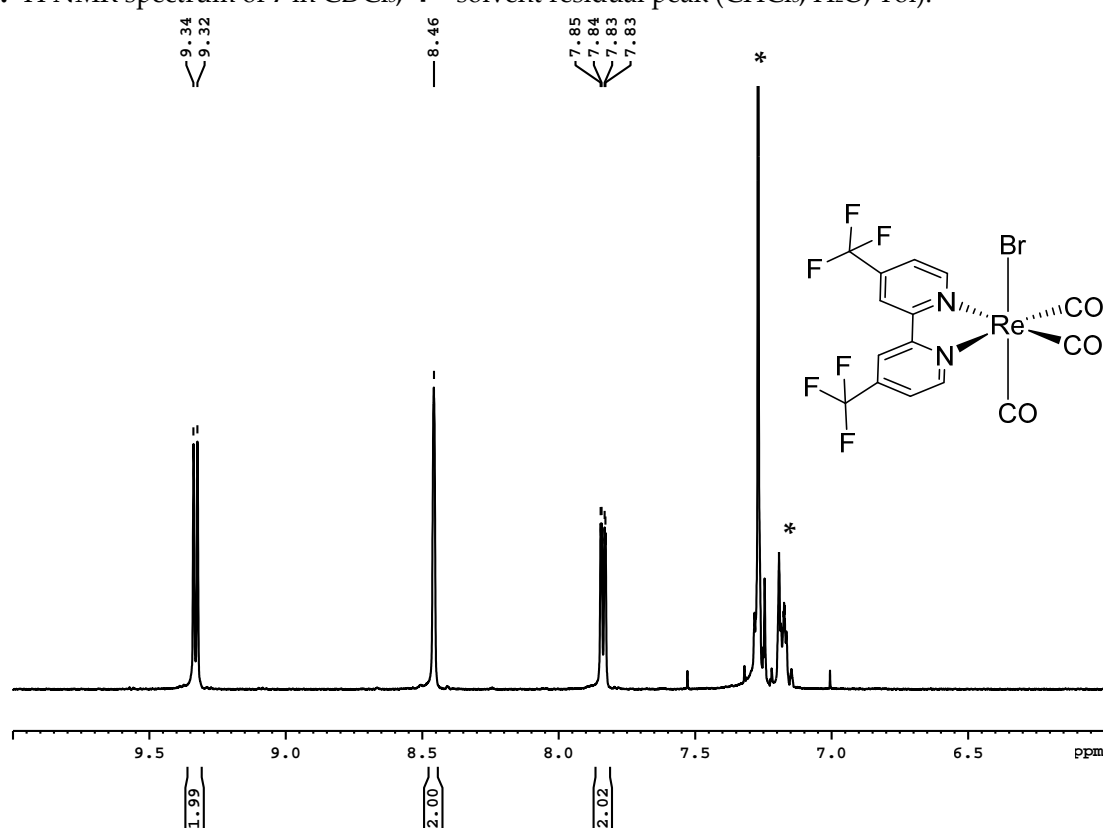

**Figure S4a.**  $^1\text{H}$  NMR spectrum of aromatic region of **7** in  $\text{CDCl}_3$  (zoom), \* = solvent residual peak ( $\text{CHCl}_3$ , Tol).

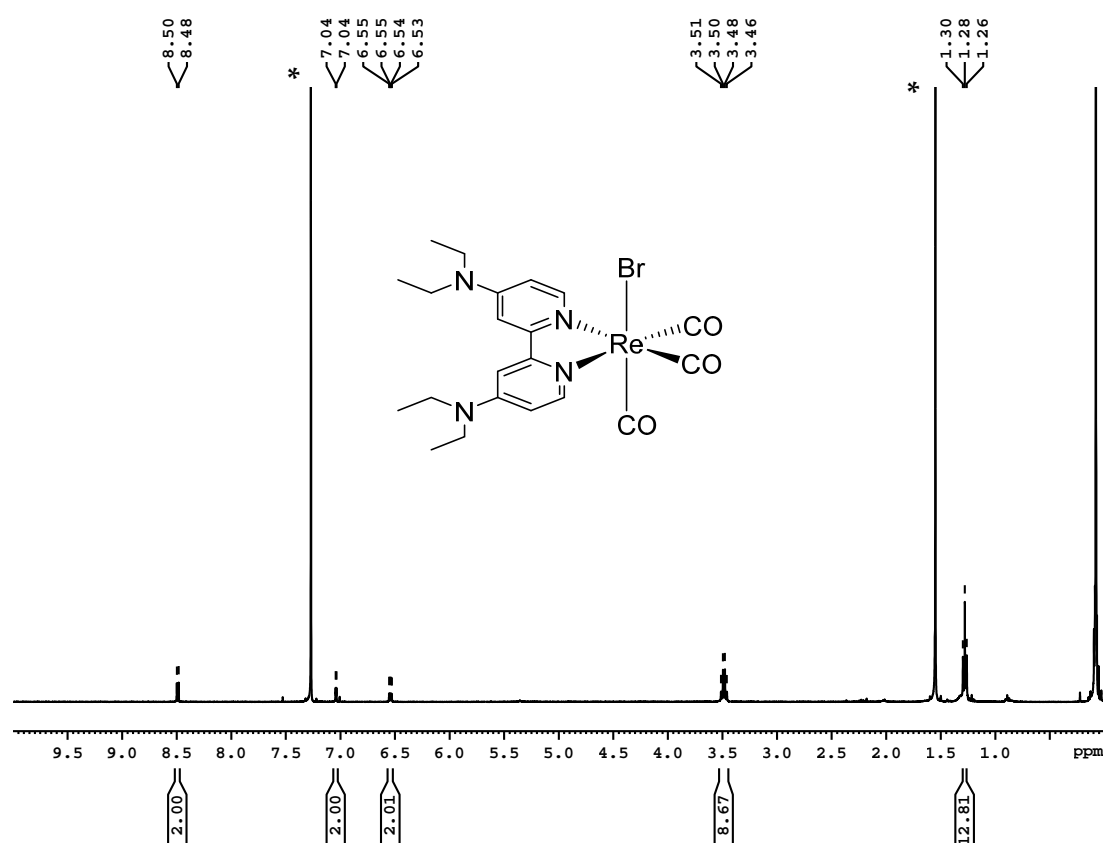

**Figure S5.**  $^1\text{H}$  NMR spectrum of **8** in  $\text{CDCl}_3$ , \* = solvent residual peak ( $\text{CHCl}_3$ ,  $\text{H}_2\text{O}$ ).

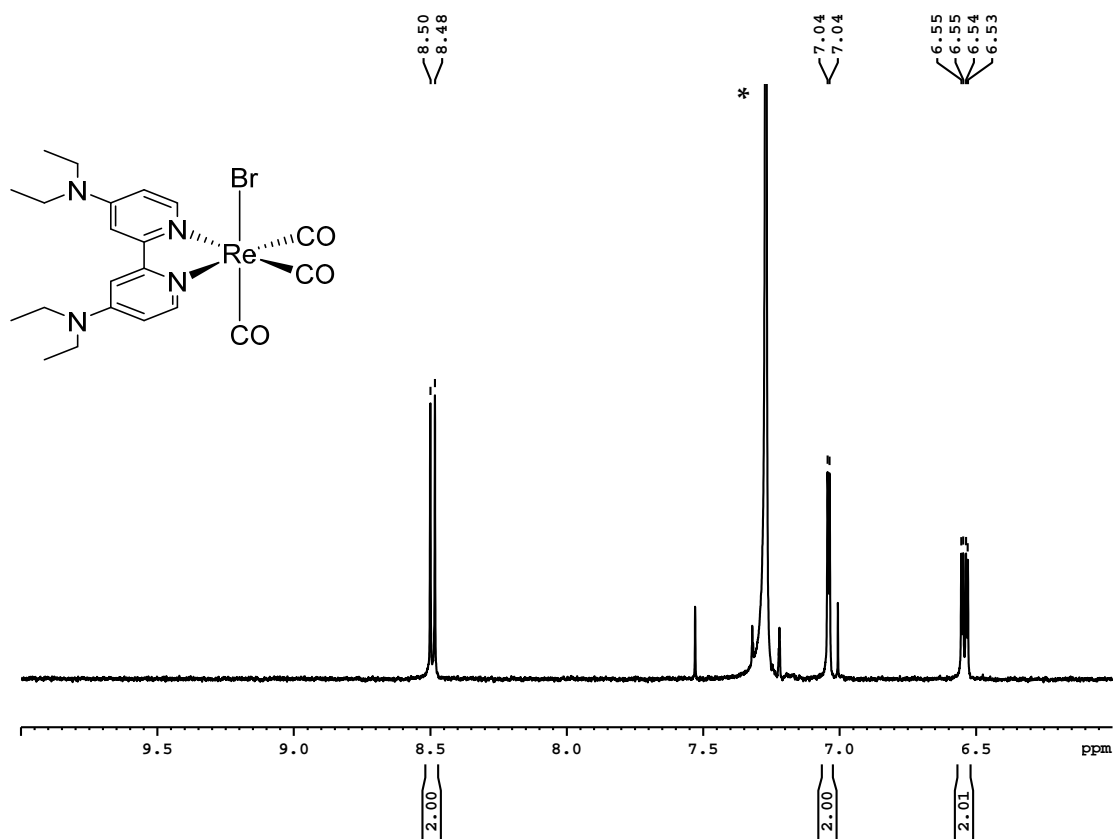

**Figure S5a.**  $^1\text{H}$  NMR spectrum of aromatic region of **8** in  $\text{CDCl}_3$  (zoom), \* = solvent residual peak ( $\text{CHCl}_3$ ).

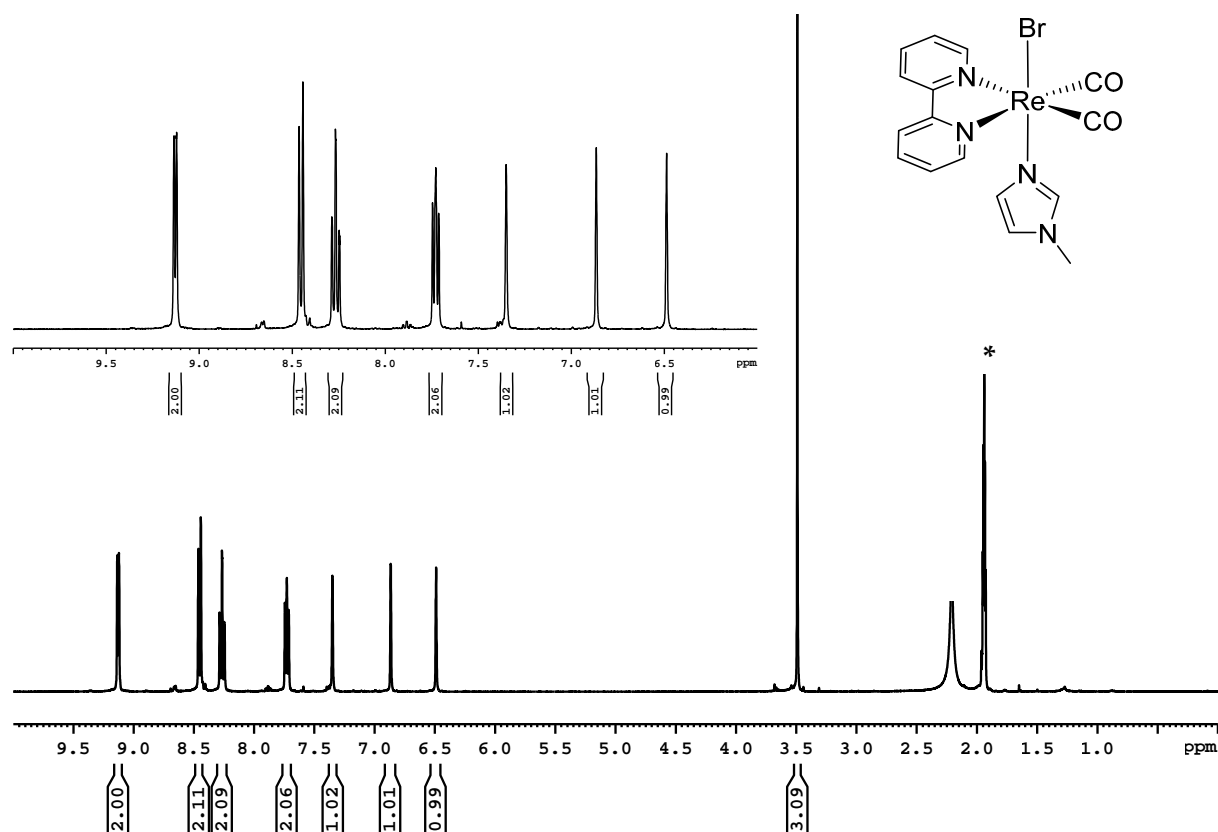

**Figure S6.** <sup>1</sup>H NMR spectrum of **3a** in CD<sub>3</sub>CN. \* = solvent residual peak.

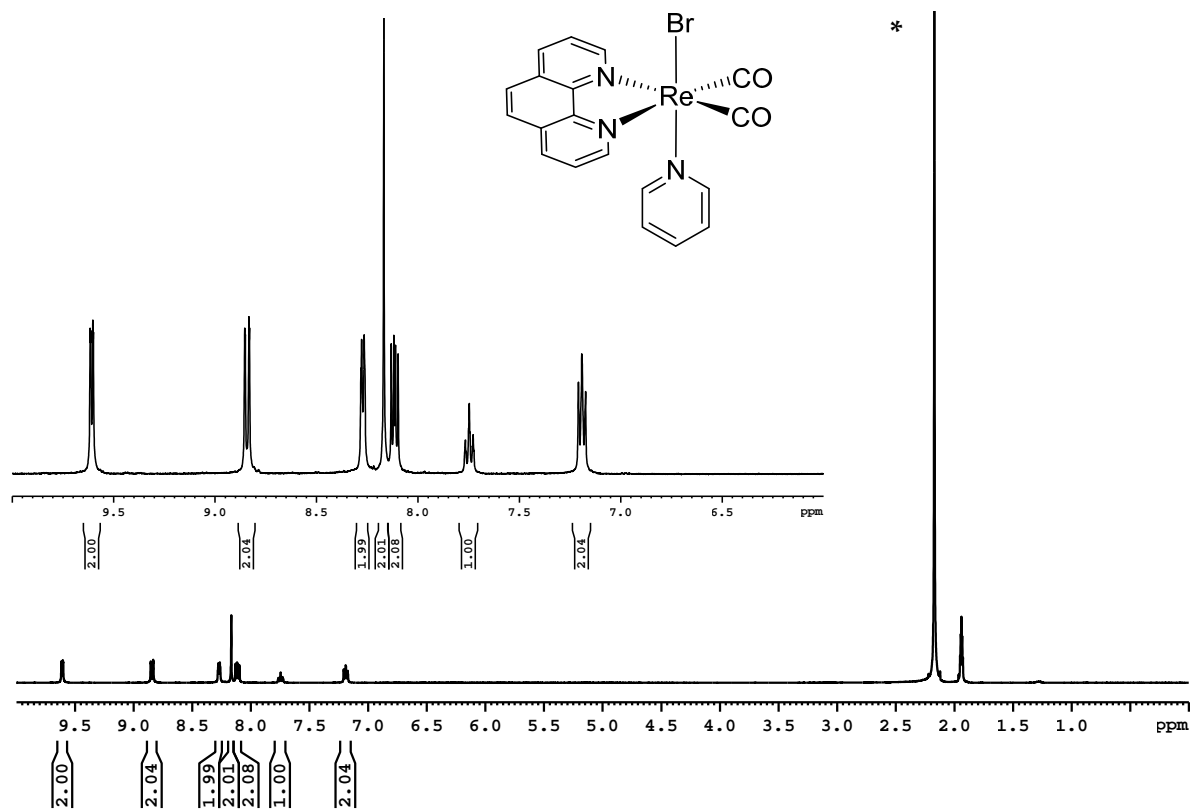

**Figure S7.** <sup>1</sup>H NMR spectrum of **2c** in CD<sub>3</sub>CN. \* = solvent residual peak.

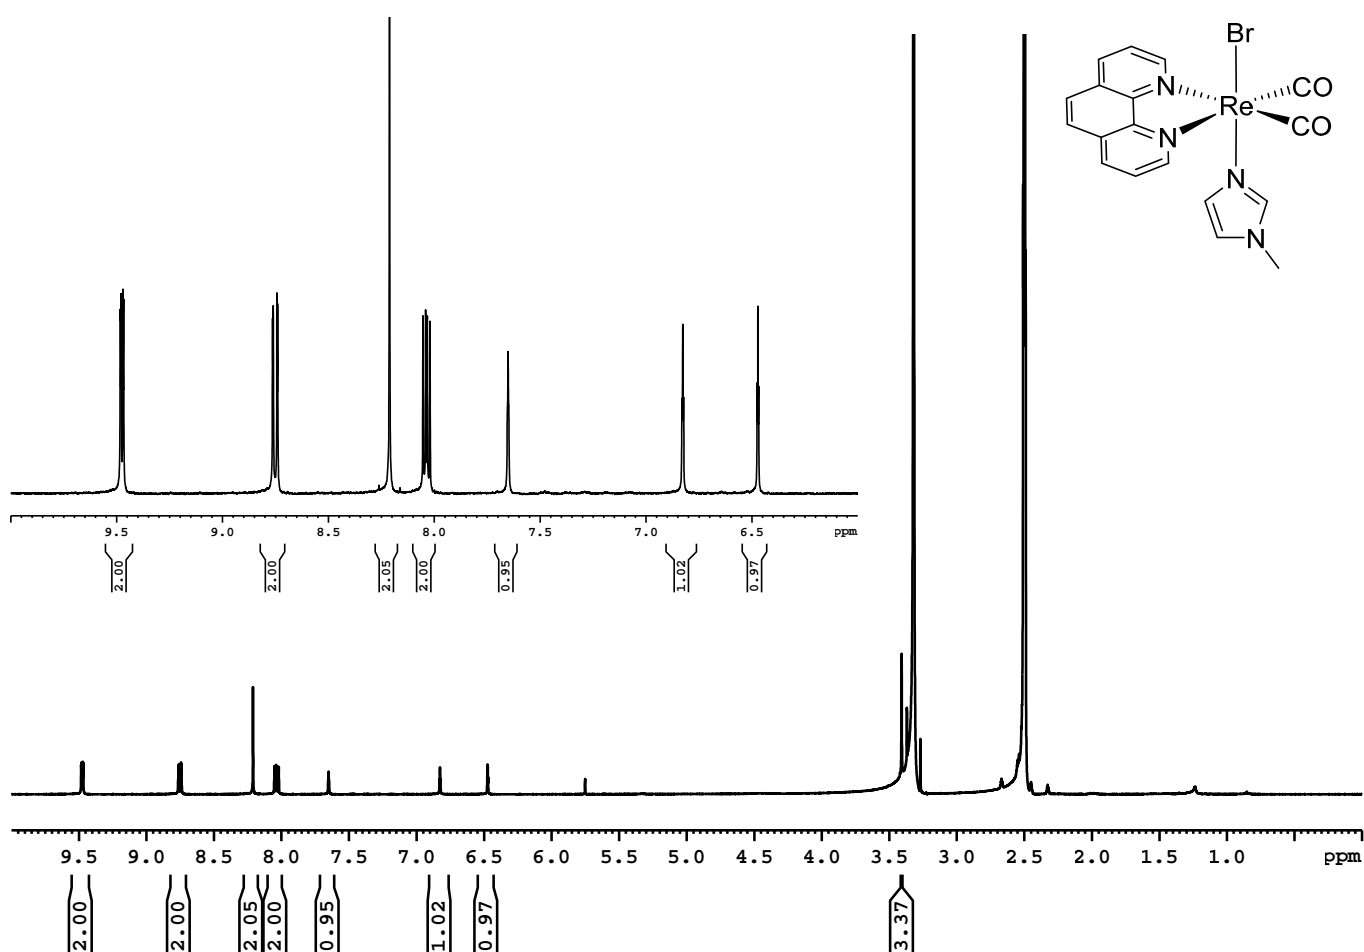

**Figure S8.**  $^1\text{H}$  NMR spectrum of **3c** in  $(\text{CD}_3)_2\text{SO}$ . \* = solvent residual peak.



## IR spectra

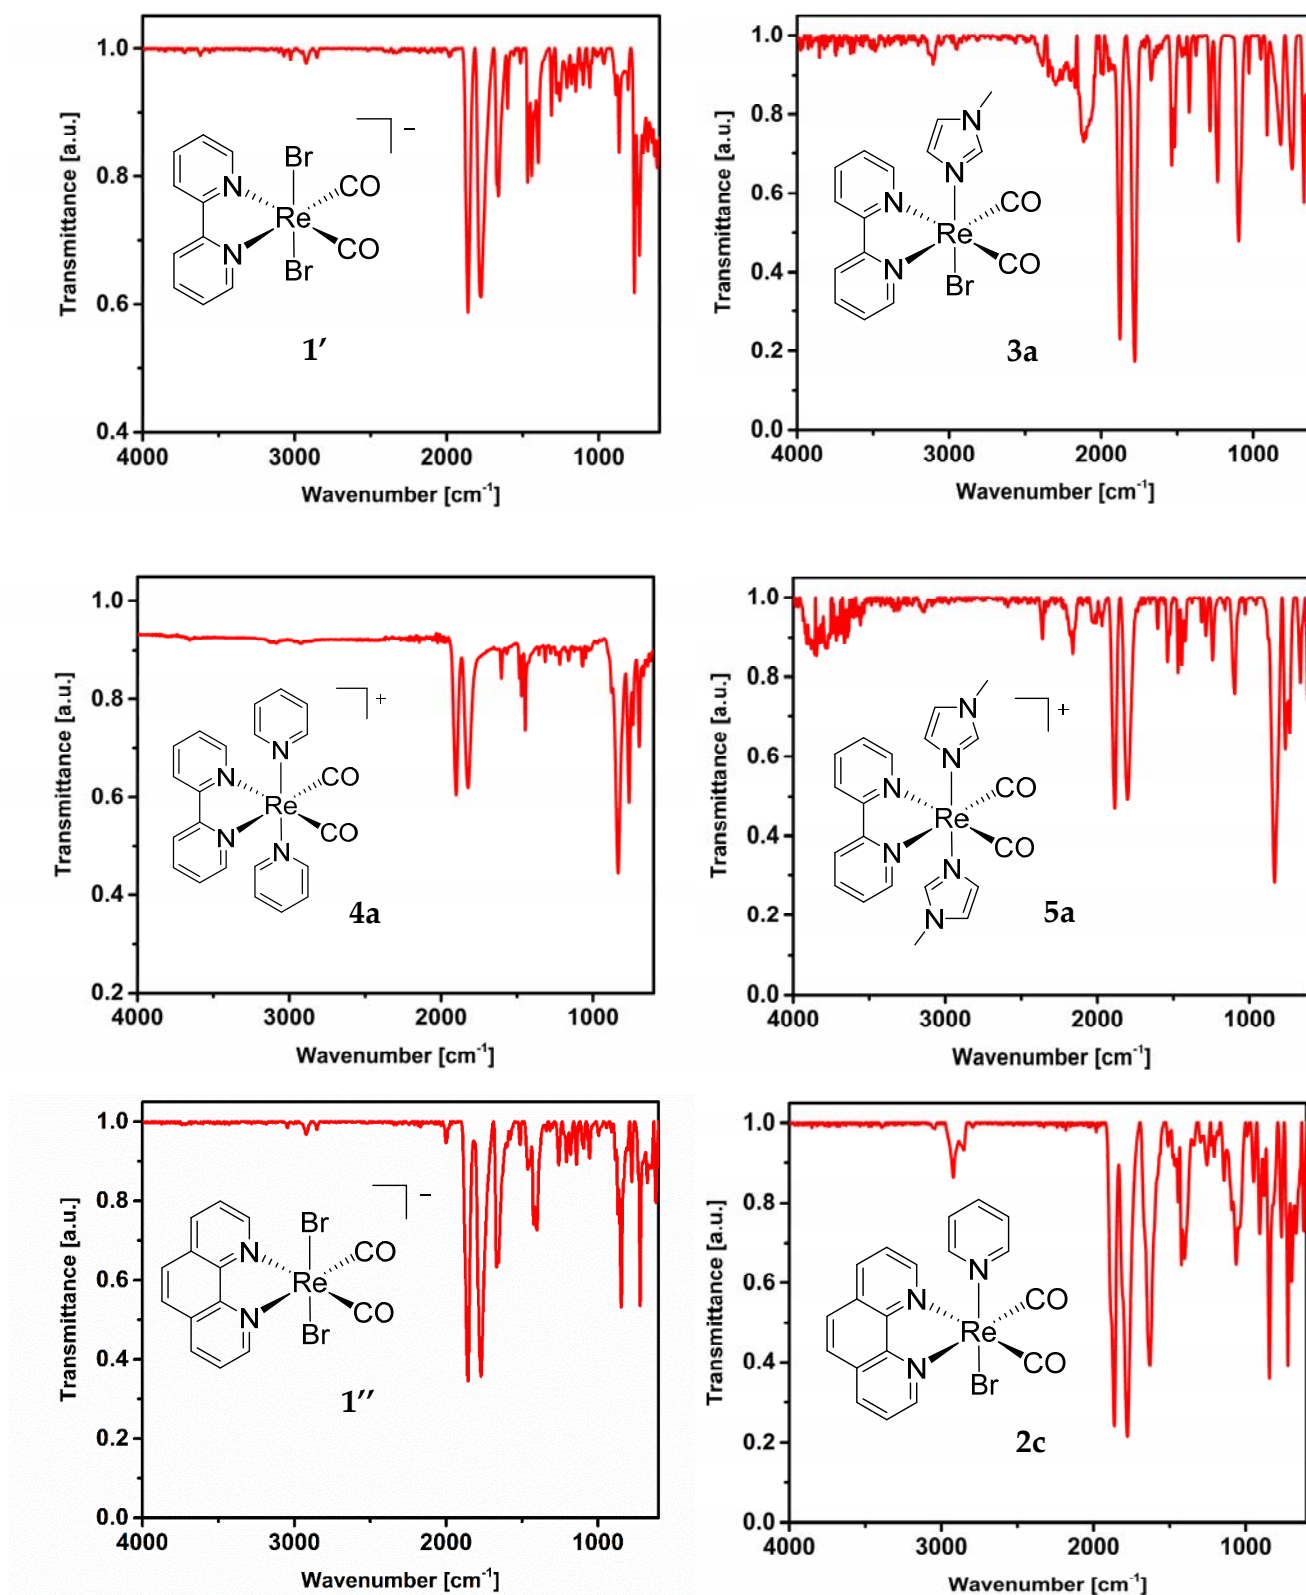

Figure S9. IR spectra (solid) of compounds.

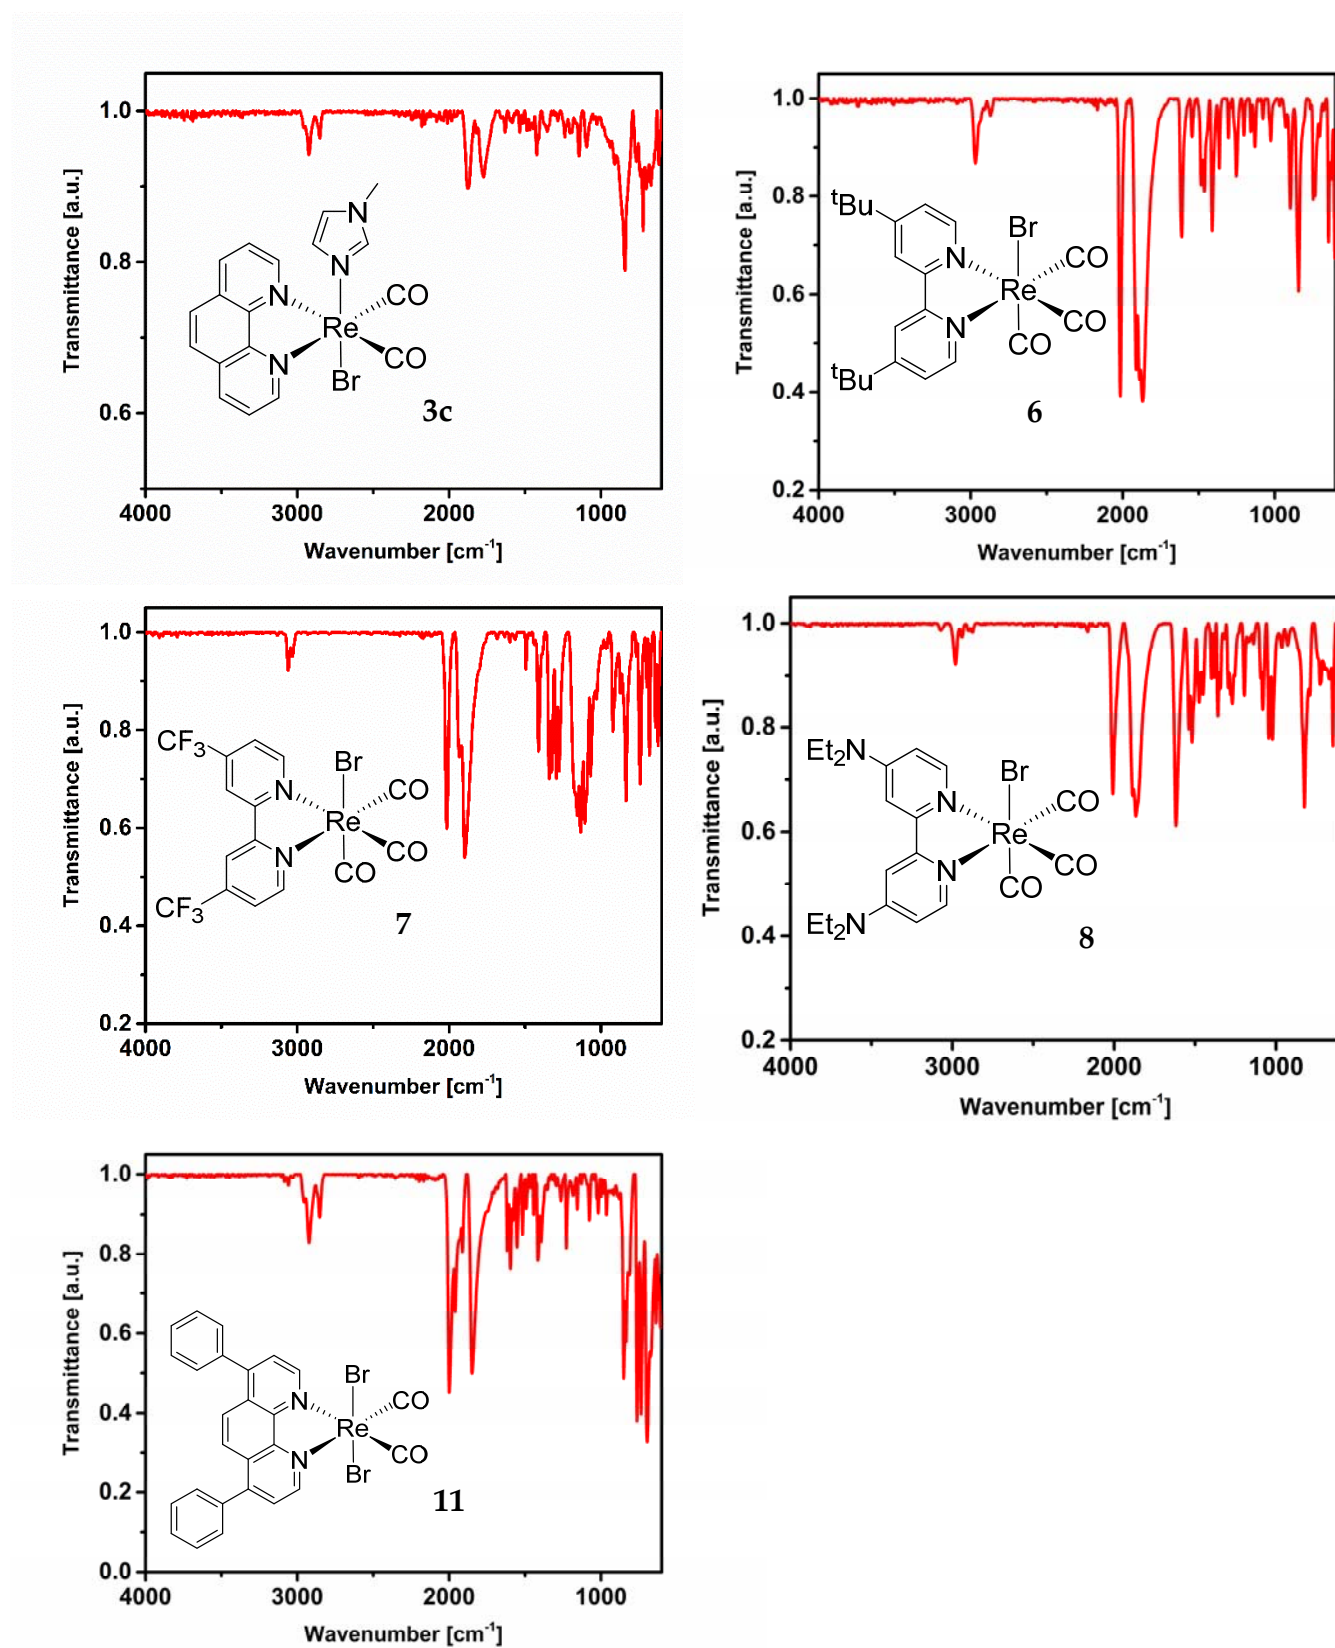

Figure S9. IR spectra (solid) of compounds.

## UV-Vis spectra

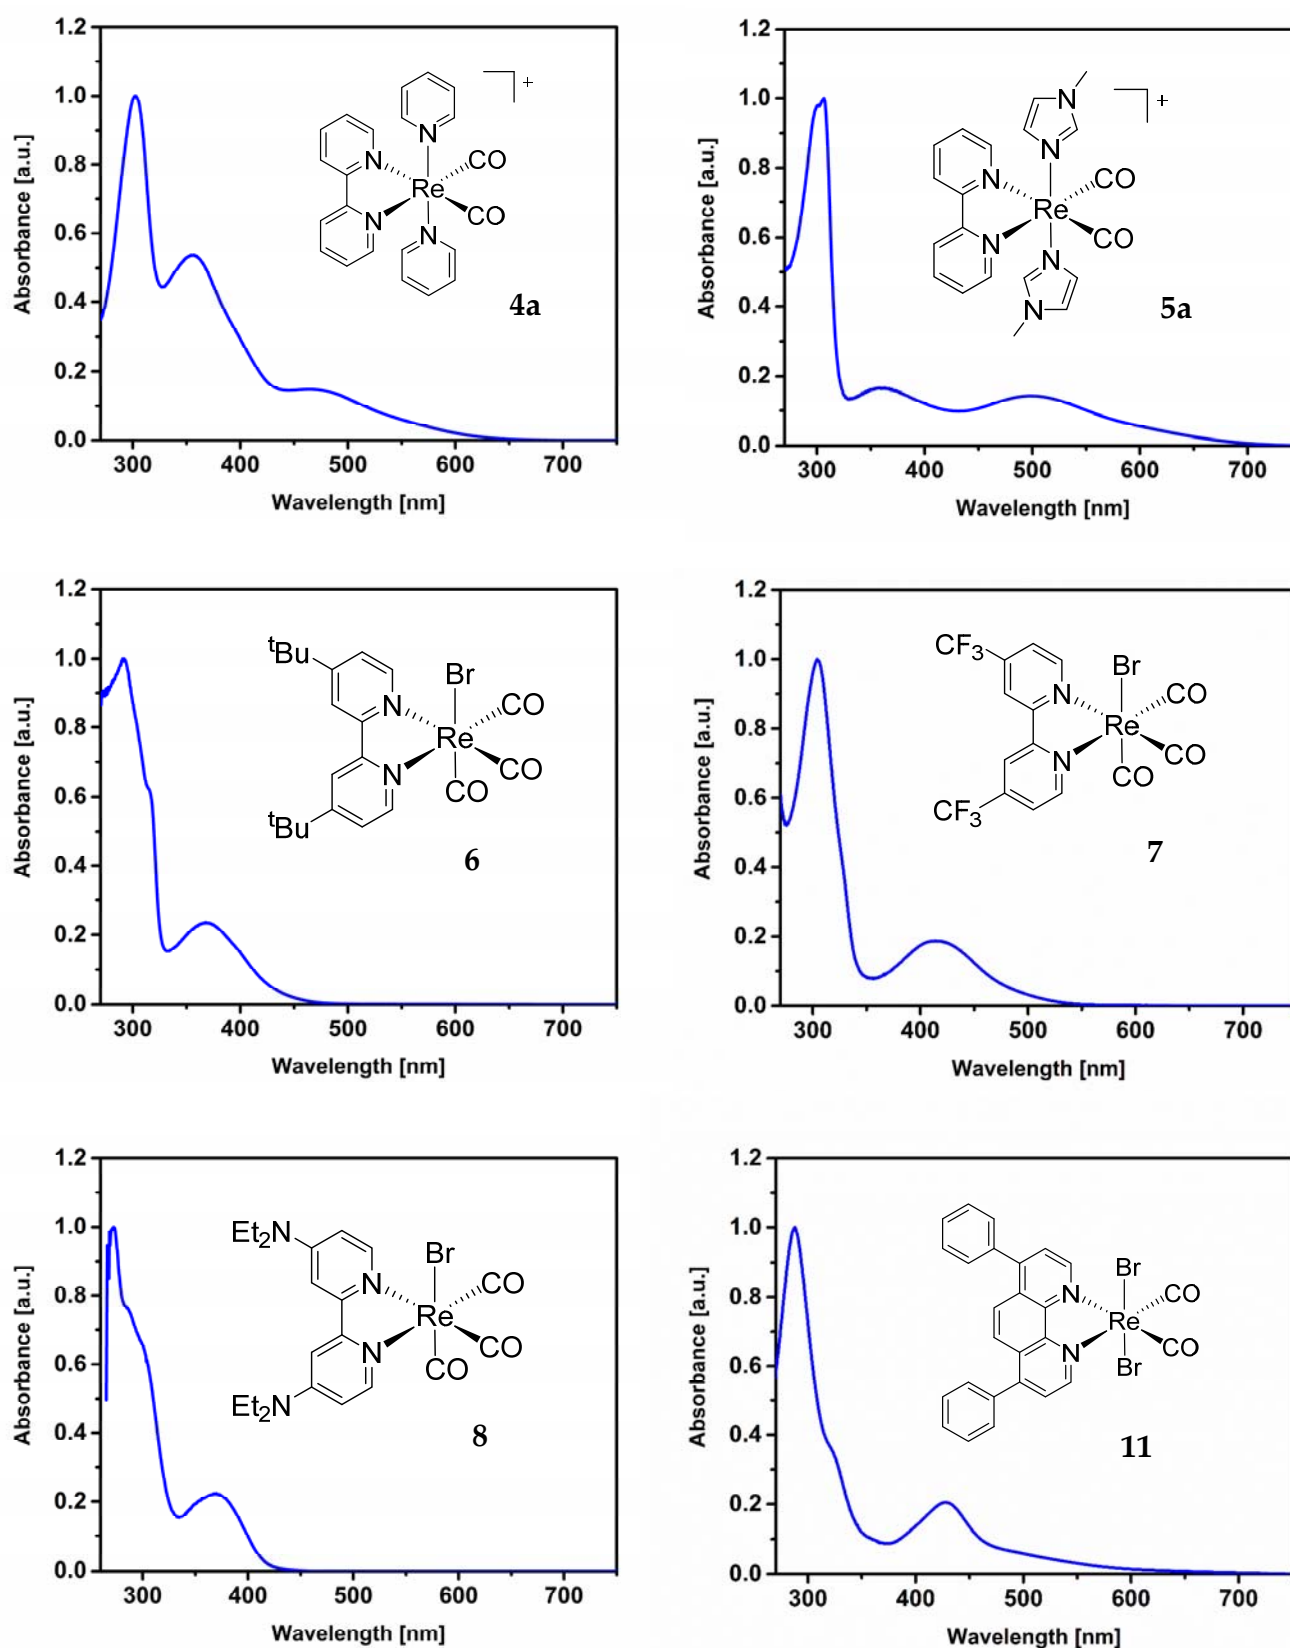

Figure 10. UV-Vis spectrum of compounds (in DMF).

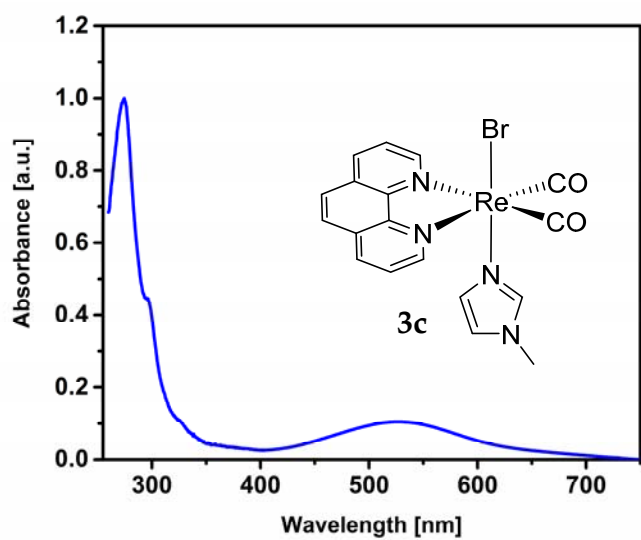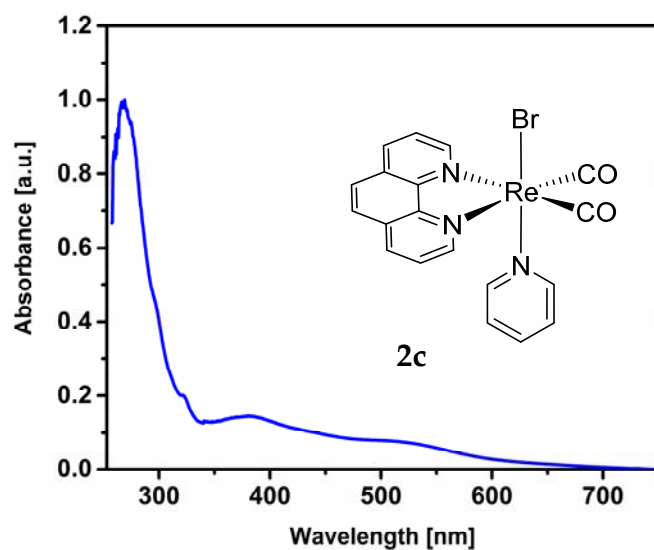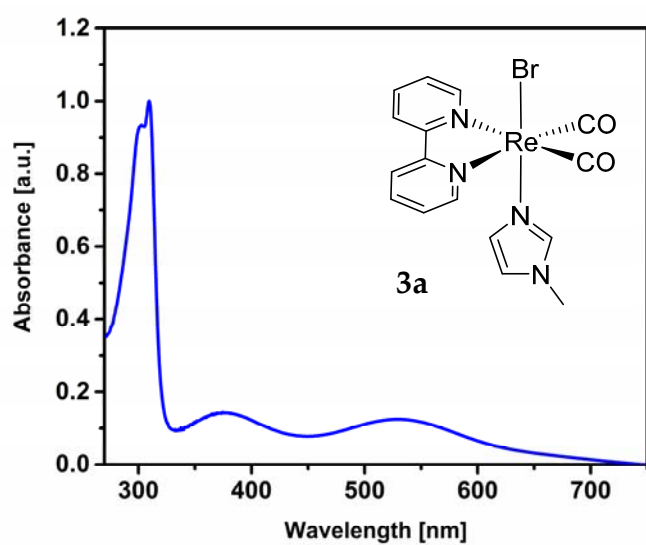

Figure S10 cont'd. UV-Vis spectrum of compounds (in DMF).

**Table S1a.** *In silico* pre-screening of binding affinities (*b.a.*; docking scores, kcal/mol) of rhenium complexes against structurally characterized membrane bound *S. aureus* proteins: Penicillin Binding Proteins (PBPs).

| Complex<br>Protein | Docking score (kcal/mol) |           |              |             |              |          |              |             |
|--------------------|--------------------------|-----------|--------------|-------------|--------------|----------|--------------|-------------|
|                    | PBP2                     | $\Delta$  | PBP2a        | $\Delta$    | PBP3         | $\Delta$ | PBP4         | $\Delta$    |
| Control*           | -8.2                     | 0         | -9.6         | 0           | -10.5        | 0        | -8.5         | 0           |
| <b>1a</b>          | -5.1                     | +3.4      | -6.4         | +3.5        | -5.7         | +5.1     | -6.8         | +2          |
| <b>2a</b>          | -6.1                     | +2.4      | -6.2         | +3.7        | -6.4         | +4.4     | -8.1         | +0.7        |
| <b>3a</b>          | -6.2                     | +2.3      | -6.0         | +3.9        | -6.2         | +4.6     | -8.1         | +0.7        |
| <b>4a</b>          | -6.7                     | +1.8      |              | +3.6        | -6.7         | +4.1     | -6.8         | +2          |
| <b>5a</b>          | -6.4                     | +2.1      | -5.6         | +4.3        | -6.6         | +4.2     | -6.5         | +2.3        |
| <b>1b</b>          | -6.4                     | +2.1      | -8.1         | +1.8        | -7.1         | +3.7     | <b>-8.9</b>  | <b>-0.1</b> |
| <b>2b</b>          | -7.8                     | +0.7      | -6.7         | +3.2        | -7.4         | +3.4     | <b>-9.9</b>  | <b>-1.1</b> |
| <b>3b</b>          | -7.7                     | +0.8      | -6.6         | +3.3        | -7.2         | +3.6     | <b>-9.6</b>  | <b>-0.8</b> |
| <b>4b</b>          | -7.9                     | +0.6      | -5.5         | +4.4        | -6.8         | +4       | -6.6         | +2.2        |
| <b>5b</b>          | -7.6                     | +0.9      | -5.5         | +4.4        | -6.7         | +4.1     | -6.6         | +2.2        |
| <b>1c</b>          | -5.9                     | +2.6      | -7.7         | +2.2        | -6.7         | +4.1     | -8.0         | +0.8        |
| <b>2c</b>          | -6.2                     | +2.3      | -6.0         | +3.9        | -7.0         | +3.8     | -6.8         | +2          |
| <b>3c</b>          | -6.3                     | +2.2      | -6.2         | +3.7        | -7.1         | +3.7     | -8.5         | +0.3        |
| <b>6</b>           | -7.2                     | +1.3      | -8.6         | +1.3        | -7.7         | +3.1     | <b>-9.5</b>  | <b>-0.7</b> |
| <b>7</b>           | -7.3                     | +1.2      | -8.6         | +1.3        | -8.6         | +2.2     | <b>-9.1</b>  | <b>-0.3</b> |
| <b>8</b>           | -6.1                     | +2.4      | -7.7         | +2.2        | -7.4         | +3.4     | -8.3         | +0.5        |
| <b>9a</b>          | -6.0                     | +2.5      | -8.1         | +1.8        | -7.0         | +3.8     | -8.3         | +0.5        |
| <b>9b</b>          | -6.6                     | +1.9      | -6.7         | +3.2        | -7.1         | +3.7     | -8.0         | +0.8        |
| <b>9c</b>          | -6.7                     | +1.8      | -7.2         | +2.7        | -7.2         | +3.6     | -6.9         | +1.9        |
| <b>10</b>          | -7.9                     | +0.6      | <b>-10.2</b> | <b>-0.3</b> | <b>-10.3</b> | +0.5     | <b>-12.3</b> | <b>-3.5</b> |
| <b>13</b>          | -8.1                     | +0.4      | -8.2         | +1.7        | -8.6         | +2.2     | <b>-9.1</b>  | <b>-0.3</b> |
| <b>14</b>          | -7.6                     | +0.9      | -9.7         | +0.2        | <b>-10.0</b> | +0.8     | <b>-10.2</b> | <b>-1.4</b> |
| <b>15</b>          | -8.9                     | -0.4      | -7.3         | +2.6        | -8.3         | +2.5     | <b>-10.5</b> | <b>-1.7</b> |
| <b>16</b>          | -6.4                     | +2.1      | -5.9         | +4          | -7.3         | +3.5     | -8.5         | +0.3        |
| <b>17</b>          | -9.0                     | -0.5      | -6.8         | +3.1        | -7.2         | +3.6     | -8.1         | 0.7         |
| <b>18</b>          | -8.3                     | +0.2      | <b>-9.9</b>  | <b>0</b>    | -9.4         | +1.4     | <b>-10.2</b> | <b>-1.4</b> |
| <b>19</b>          | <b>-9.5</b>              | <b>-1</b> | -9.3         | +0.6        | <b>-10.5</b> | +0.3     | <b>-10.7</b> | <b>-1.9</b> |

\* Ceftobiprole in all cases.  $\Delta$  refers to: (*b.a.* Re complex + 0.3 kcal/mol)–*b.a.* control. PDB codes: PBP2: 2OLV; PBP2a: 4DKI; PBP3: 3VSL; PBP4: 5TXI.

**Table S1b.** *In silico* pre-screening of binding affinities (*b.a.*; docking scores, kcal/mol) of non-toxic complexes against other structurally characterized membrane bound *S. aureus* proteins.

| Complex<br>Protein | Docking score (kcal/mol) |             |              |             |              |             |              |      |
|--------------------|--------------------------|-------------|--------------|-------------|--------------|-------------|--------------|------|
|                    | eLtaS                    | Δ           | SpsB         | Δ           | LtaA         | Δ           | LspA         | Δ    |
| Control*           | -8.6                     | 0           | -8.5         | 0           | -10.2        | 0           | -10.8        | 0    |
| <b>1a</b>          | -6.0                     | +2.9        | -5.5         | +3.3        | -6.2         | +4.3        | -6.1         | +5   |
| <b>2a</b>          | -6.8                     | +2.1        | -6.2         | +2.6        | -7.1         | +3.4        | -7.1         | +4   |
| <b>3a</b>          | -7.0                     | +1.9        | -6.2         | +2.6        | -6.9         | +3.6        | -7.1         | +4   |
| <b>4a</b>          | -7.2                     | +1.7        | -6.1         | +2.7        | -7.6         | +2.9        | -7.1         | +4   |
| <b>5a</b>          | -7.2                     | +1.7        | -5.9         | +2.9        | -6.9         | +3.6        | -7.1         | +4   |
| <b>1b</b>          | -6.8                     | +2.1        | -6.2         | +2.6        | -7.6         | +2.9        | -7.4         | +3.7 |
| <b>2b</b>          | -7.5                     | +1.4        | -6.7         | +2.1        | -8.5         | +2          | -7.7         | +3.4 |
| <b>3b</b>          | -7.2                     | +1.7        | -6.4         | +2.4        | -8.2         | +2.3        | -7.3         | +3.8 |
| <b>4b</b>          | -7.2                     | +1.7        | -6.6         | +2.2        | -8.1         | +2.4        | -7.1         | +4   |
| <b>5b</b>          | -7.0                     | +1.9        | -6.5         | +2.3        | -7.6         | +2.9        | -7.0         | +4.1 |
| <b>1c</b>          | -7.1                     | +1.8        | -7.4         | +1.4        | -7.2         | +3.3        | -7.3         | +3.8 |
| <b>2c</b>          | -7.1                     | +1.8        | -6.4         | +2.4        | -7.7         | +2.8        | -7.4         | +3.7 |
| <b>3c</b>          | -7.3                     | +1.6        | -7.0         | +1.8        | -7.9         | +2.6        | -7.3         | +3.8 |
| <b>6</b>           | -7.0                     | +1.9        | -6.5         | +2.3        | -8.3         | +2.2        | -7.5         | +3.6 |
| <b>7</b>           | -7.9                     | +1          | -6.9         | +1.9        | -8.1         | +2.4        | -8.2         | +2.9 |
| <b>8</b>           | -5.7                     | +3.2        | -5.6         | +3.2        | -7.6         | +2.9        | -6.9         | +4.2 |
| <b>9a</b>          | -7.0                     | +1.9        | -7.0         | +1.8        | -7.3         | +3.2        | -6.6         | +4.5 |
| <b>9b</b>          | -6.9                     | +2          | -6.2         | +2.6        | -7.3         | +3.2        | -7.3         | +3.8 |
| <b>9c</b>          | -7.1                     | +1.8        | -7.2         | +1.6        | -7.7         | +2.8        | -7.1         | +4   |
| <b>10</b>          | -8.4                     | +0.5        | -7.7         | +1.1        | <b>-10.3</b> | <b>+0.2</b> | -9.3         | +1.8 |
| <b>13</b>          | -7.9                     | +1          | <b>-9.1</b>  | <b>-0.3</b> | -9.2         | +1.3        | -8.9         | +2.2 |
| <b>14</b>          | -8.8                     | +0.1        | -8.0         | +0.8        | -9.7         | +0.8        | -9.7         | +1.4 |
| <b>15</b>          | <b>-9.4</b>              | <b>-0.5</b> | <b>-9.6</b>  | <b>-0.8</b> | <b>-10.4</b> | <b>+0.1</b> | -8.7         | +2.4 |
| <b>16</b>          | -6.5                     | +2.4        | -7.5         | +1.3        | -7.9         | +2.6        | -7.0         | +4.1 |
| <b>17</b>          | -8.9                     | 0           | -7.4         | -1.1        | -9.4         | +1.1        | -8.9         | +2.2 |
| <b>18</b>          | <b>-10.8</b>             | <b>-1.9</b> | <b>-9.8</b>  | <b>-1</b>   | <b>-10.5</b> | <b>0</b>    | <b>-10.6</b> | +0.5 |
| <b>19</b>          | <b>-10.9</b>             | <b>-2</b>   | <b>-10.4</b> | <b>-1.6</b> | <b>-11.3</b> | <b>-0.8</b> | -9.3         | +1.8 |

\* Controls are respectively: compound 1771 (eLtaS and LtaA) [1]; Arilomycin A2 (SpsB) [2]; myxovirescin (LspA) [3]. Δ refers to: *b.a.* control–(*b.a.* Re complex + 0.3 kcal/mol). PDB codes: Lipoteichoic acids synthase (eLtaS): 2W5Q; Type-I signal peptidase (SpsB): 4WVJ; Lipoteichoic acids flippase (LtaA): 6S7V; Lipoprotein signal peptidase II (LspA): 6RYP.



Protein surface visualisations of the non-polar polar ratio (NPP) and patch analysis for the electrostatic surface potential. The protein-sol server (<https://protein-sol.manchester.ac.uk/>) [4] for sequence-based prediction of protein solubility was used for calculating and mapping patches of hydrophobicity and charge on the protein surface.

The large hydrophobic surface (higher NPP ratio) colored in green is for the case of **3VSL** and **5TXI** presented in Figure S8, and **6S7V** and **6RYP** presented in Figure S9. Patch analysis is introduced for electrostatic potential, using the Finite Difference Poisson-Boltzmann (FDPB) methods [5] that aids visualisation of asymmetric charge distributions.

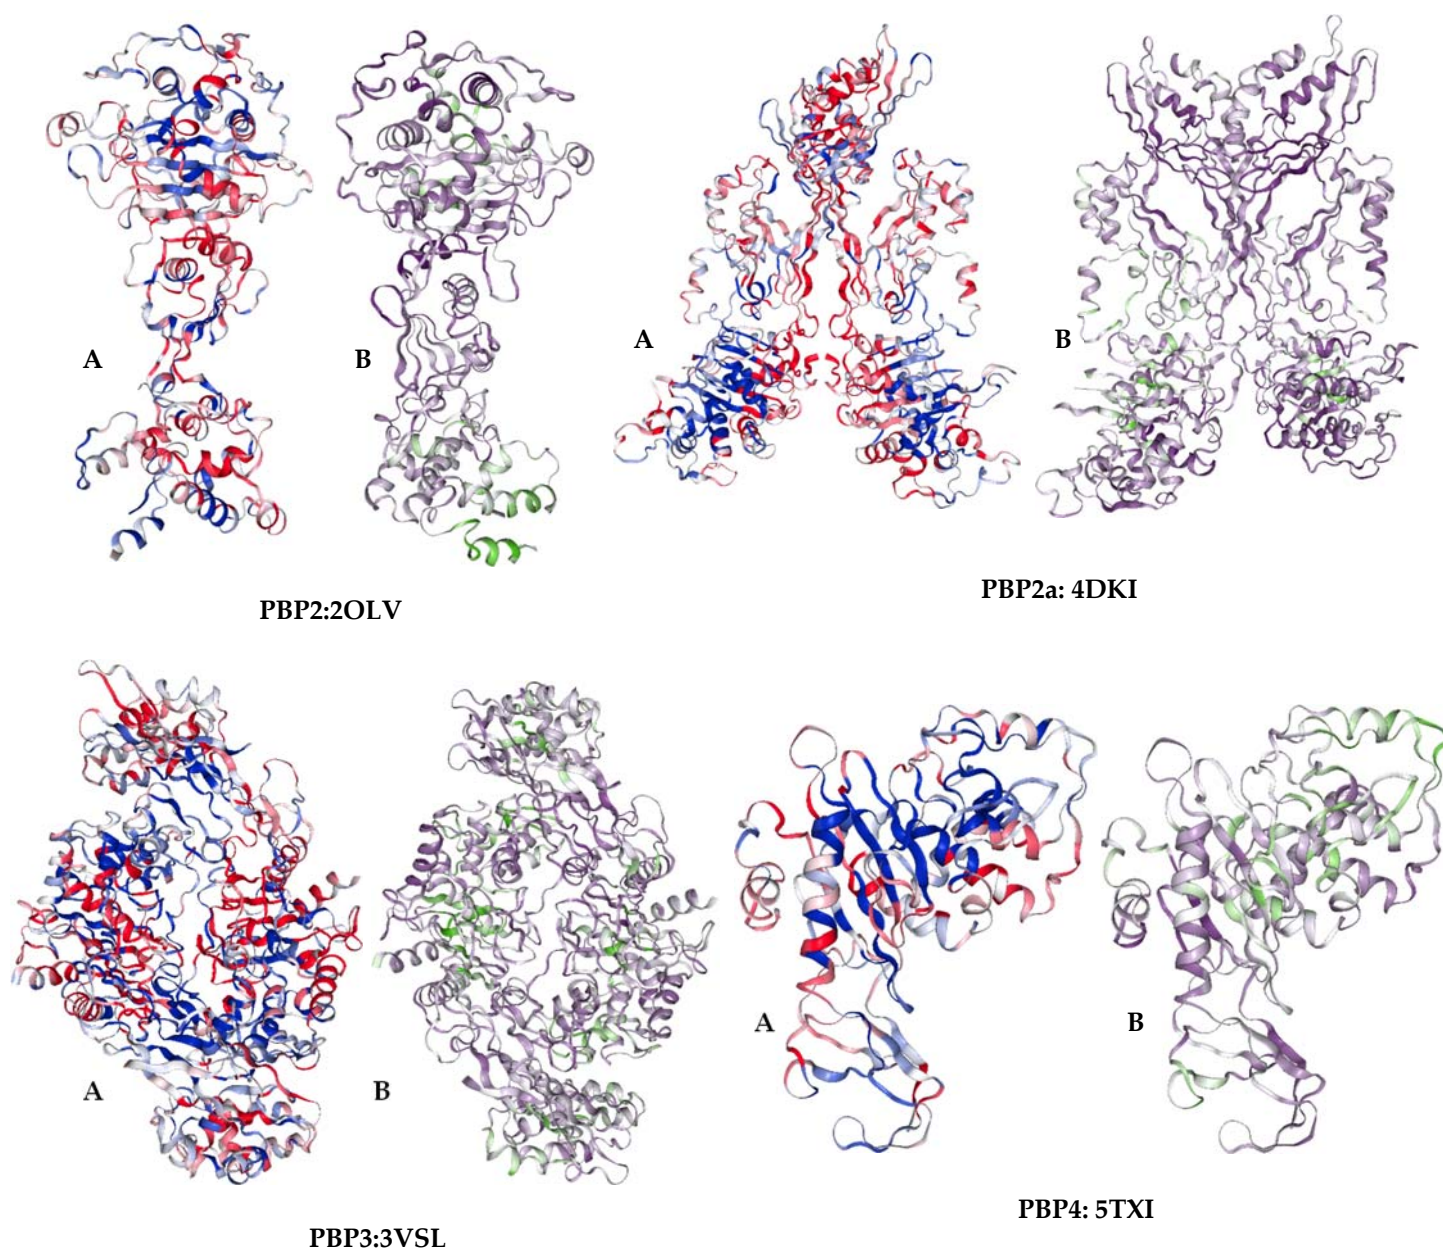

**Figure S11.** Visualisation of surface protein surface polarity (A) non-polar to polar SASA colour-coded from low NPP ratio (purple) to high NPP ratio (green), and in (B) colour-coded from negative charge (red) to positive charge (blue). Regions of high hydrophobicity are coloured green, low hydrophobicity coloured purple.

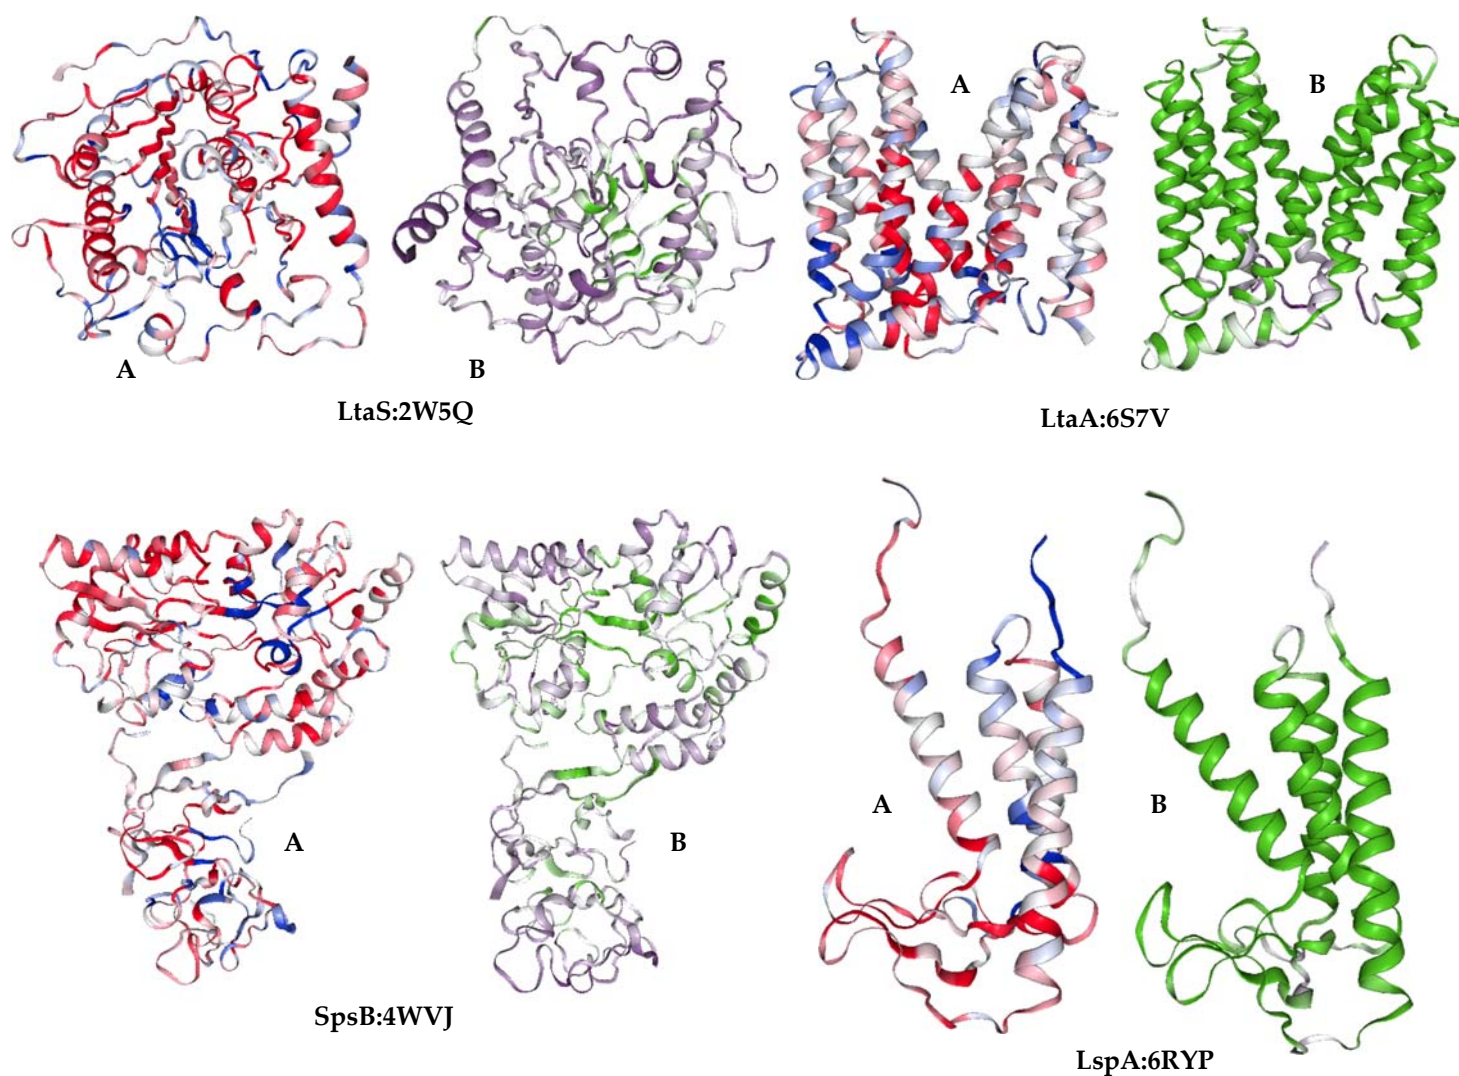

**Figure S11.** Visualisation of surface protein surface polarity (A) non-polar to polar SASA colour-coded from low NPP ratio (purple) to high NPP ratio (green), and in (B) colour-coded from negative charge (red) to positive charge (blue). Regions of high hydrophobicity are coloured green, low hydrophobicity coloured purple.



**Table S2.** Pockets prediction–mapping the ranking with residues environment distribution

| 2OLV         | rank | score | probability | sas_points | surf_atoms | residue_ids                                                                                                                      |
|--------------|------|-------|-------------|------------|------------|----------------------------------------------------------------------------------------------------------------------------------|
| pocket1/blue | 1    | 9.11  | 0.534       | 120        | 49         | B_114 B_124 B_129 B_132 B_133 B_145<br>B_146 B_147 B_151 B_152 B_155 B_156<br>B_165 B_167 B_168 B_171 B_195 B_196<br>B_231 B_232 |
| pocket2/red  | 2    | 8.43  | 0.496       | 109        | 52         | A_114 A_129 A_145 A_146 A_147<br>A_151 A_152 A_155 A_156 A_163 A_165<br>A_167 A_168 A_171 A_195 A_196 A_231<br>A_232             |
| pocket3      | 3    | 7.11  | 0.406       | 67         | 31         | B_398 B_435 B_436 B_437 B_453 B_454<br>B_455 B_456 B_496 B_569 B_584 B_586<br>B_587 B_588 B_641                                  |

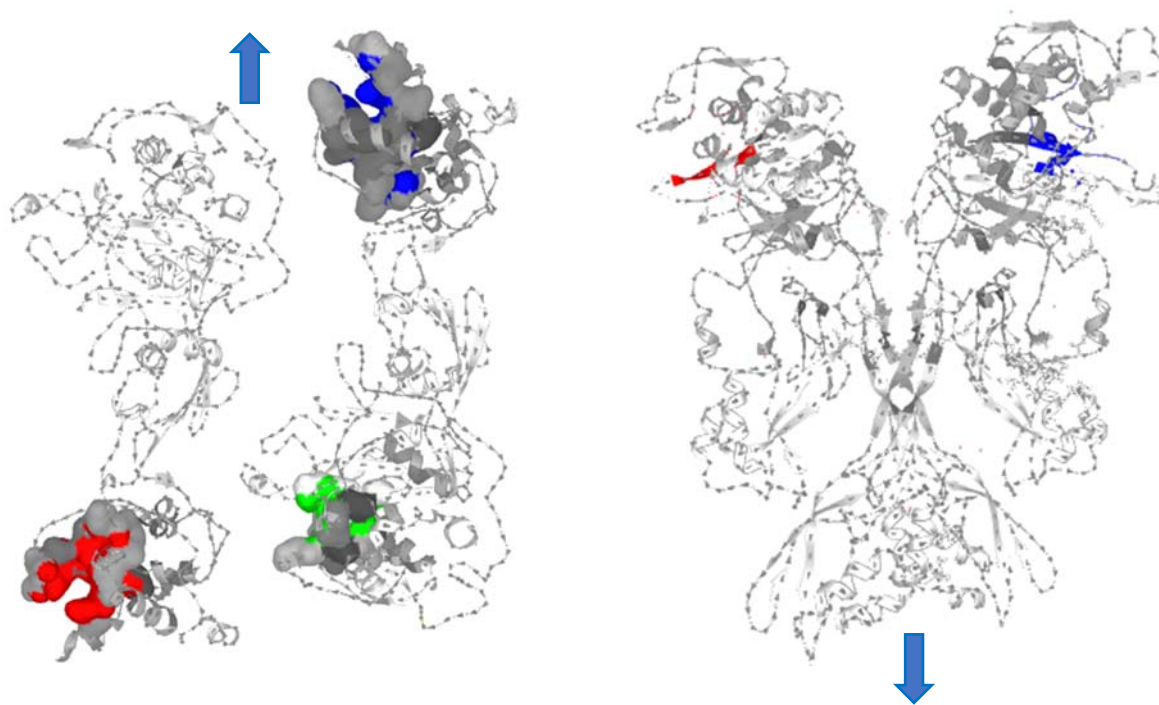

| 4DKI         | rank | score | robability | sas_points | surf_atoms | residue_ids                                                                                                                                                          |
|--------------|------|-------|------------|------------|------------|----------------------------------------------------------------------------------------------------------------------------------------------------------------------|
| pocket1/blue | 1    | 20.2  | 0.84       | 143        | 67         | A_399 A_400 A_402 A_403 A_444 A_446 A_447<br>A_461 A_462 A_464 A_520 A_521 A_522 A_582<br>A_583 A_598 A_599 A_600 A_601 A_602 A_605<br>A_614 A_616 A_641 A_642 A_643 |
| pocket2/red  | 2    | 10.15 | 0.587      | 98         | 47         | B_400 B_402 B_403 B_444 B_446 B_461 B_462<br>B_464 B_519 B_520 B_521 B_522 B_582 B_583<br>B_598 B_600 B_601 B_602 B_614 B_642                                        |

| 3VSL         | rank | score | probability | sas_points | surf_atoms | residue_ids                                                                                                                                                             |
|--------------|------|-------|-------------|------------|------------|-------------------------------------------------------------------------------------------------------------------------------------------------------------------------|
| pocket1/blue | 1    | 10.85 | 0.618       | 131        | 55         | A_392 A_426 A_427 A_429 A_447 A_448<br>A_450 A_454 A_519 A_522 A_524 A_603<br>A_604 A_606 A_607 A_619 A_621 A_623<br>A_632 A_634 A_636 A_656 A_658 A_660<br>A_663 A_664 |
| pocket2/red  | 2    | 9.19  | 0.538       | 68         | 42         | B_392 B_428 B_429 B_430 B_447 B_448<br>B_450 B_454 B_522 B_524 B_603 B_619<br>B_620 B_621 B_622 B_623 B_659 B_661                                                       |

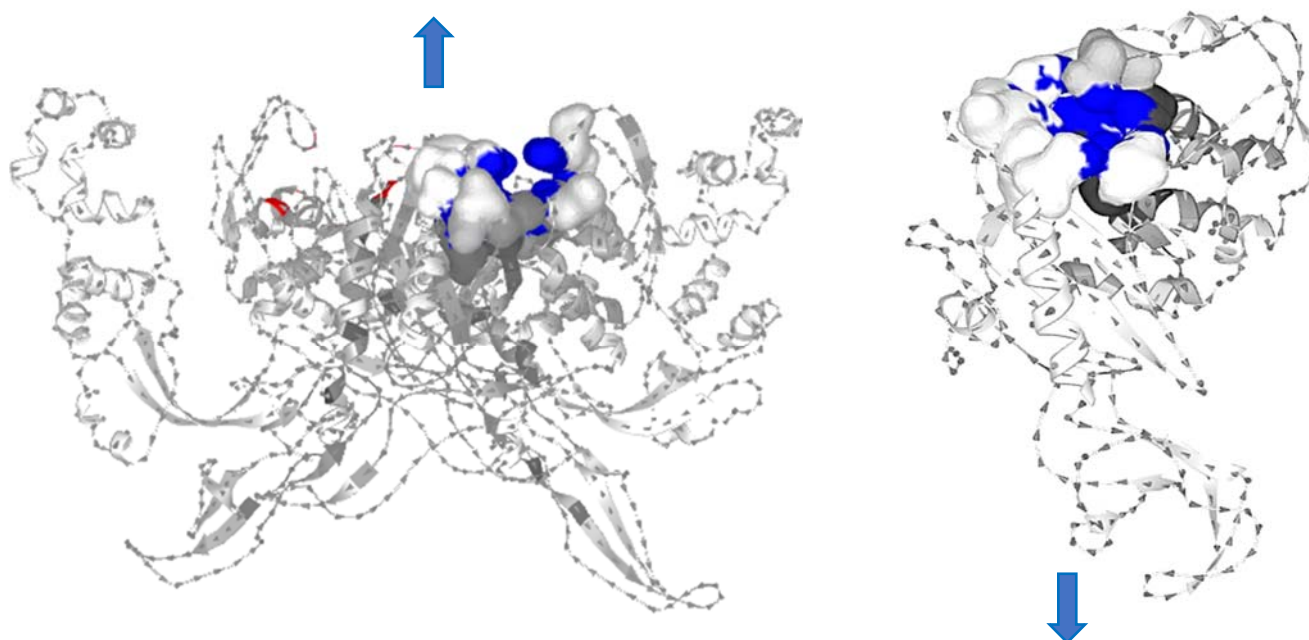

| 5TXI    | rank | score | probability | sas_points | surf_atoms | residue_ids                                                                                                      |
|---------|------|-------|-------------|------------|------------|------------------------------------------------------------------------------------------------------------------|
| pocket1 | 1    | 15.7  | 0.763       | 76         | 37         | A_114 A_115 A_139 A_141 A_180 A_181 A_182<br>A_183 A_186 A_241 A_260 A_262 A_263 A_264<br>A_268 A_291 A_297 A_75 |

| 4WVJ         | rank | score | probability | sas_points | surf_atoms | residue_ids                                                                                                                                            | surf_atom_ids                                                                                                                                                                                                                                                                                              |
|--------------|------|-------|-------------|------------|------------|--------------------------------------------------------------------------------------------------------------------------------------------------------|------------------------------------------------------------------------------------------------------------------------------------------------------------------------------------------------------------------------------------------------------------------------------------------------------------|
| pocket1/blue | 1    | 17.85 | 0.808       | 107        | 62         | A_117 A_156<br>A_159 A_161<br>A_162 A_18 A_20<br>A_21 A_216 A_236<br>A_268 A_343<br>A_346 A_347<br>A_350 A_48 A_50<br>A_51 A_67 A_68<br>A_69 A_71 A_72 | 46 50 51 52 53 62 65 74 274 279 282<br>297 298 299 308 407 422 423 424<br>426 429 433 450 451 459 460 812<br>1117 1140 1141 1142 1143 1155<br>1156 1157 1158 1159 1160 1161<br>1171 1173 1579 1580 1581 1582<br>1731 1732 1976 2538 2559 2560<br>2561 2562 2563 2564 2565 2566<br>2567 2568 2571 2604 2608 |
| pocket2 /red | 2    | 3.16  | 0.11        | 28         | 21         | A_116 A_265<br>A_267 A_327<br>A_330 A_331<br>A_335 A_98                                                                                                | 653 654 655 656 657 658 659 803<br>1956 1957 1958 1969 2418 2438<br>2439 2440 2441 2472 2476 2477<br>2479                                                                                                                                                                                                  |

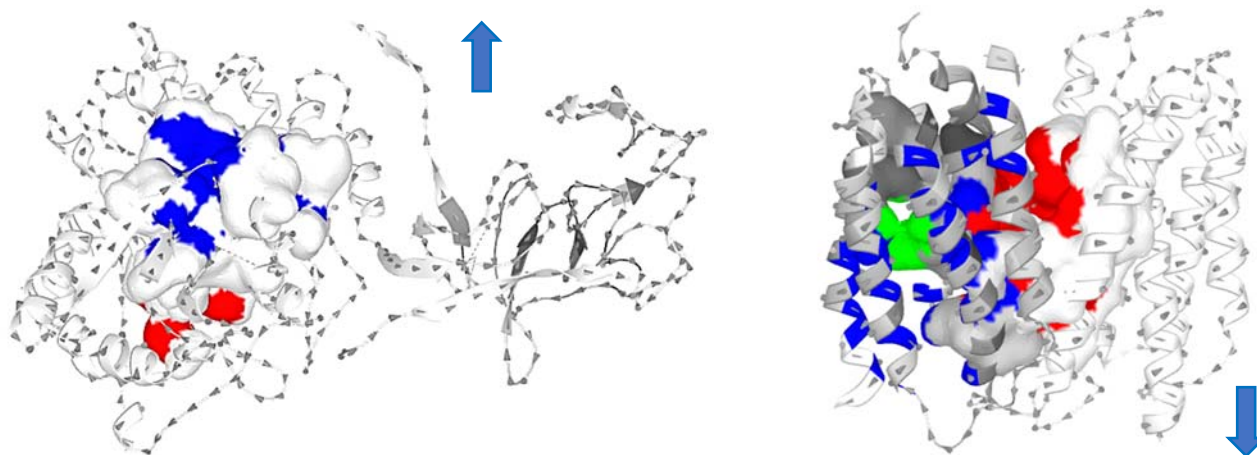

| 6S7V          | rank | score | probability | surf_atoms | residue_ids                                                                                                                                                                                                                                     |
|---------------|------|-------|-------------|------------|-------------------------------------------------------------------------------------------------------------------------------------------------------------------------------------------------------------------------------------------------|
| pocket1 /blue | 1    | 27.34 | 0.901       | 96         | A_219 A_221 A_222 A_225 A_226 A_229 A_230 A_233<br>A_234 A_237 A_240 A_256 A_259 A_260 A_263 A_283<br>A_286 A_287 A_290 A_293 A_300 A_309 A_312 A_313<br>A_316 A_320 A_323 A_324 A_327 A_330 A_377 A_380<br>A_381 A_383 A_384 A_387 A_388 A_391 |
| pocket2 /red  | 2    | 21.7  | 0.855       | 58         | A_123 A_127 A_131 A_147 A_150 A_154 A_230<br>A_231 A_32 A_320 A_324 A_327 A_328 A_348 A_35<br>A_351 A_352 A_355 A_356 A_359 A_40 A_61 A_65<br>A_68 A_72                                                                                         |
| pocket3/green | 3    | 5.91  | 0.31        | 20         | A_224 A_225 A_228 A_229 A_357 A_361 A_365 A_376<br>A_380                                                                                                                                                                                        |

| 6RYP         | rank | score | probability | surf_atoms | residue_ids                                                                                                                                                                             |
|--------------|------|-------|-------------|------------|-----------------------------------------------------------------------------------------------------------------------------------------------------------------------------------------|
| pocket1/blue | 1    | 28.61 | 0.909       | 85         | A_103 A_106 A_107 A_110<br>A_116 A_118 A_125 A_129<br>A_130 A_131 A_132 A_136<br>A_137 A_139 A_140 A_143<br>A_50 A_51 A_52 A_53 A_54<br>A_55 A_56 A_57 A_58 A_59<br>A_67 A_70 A_71 A_74 |
| pocket2/red  | 2    | 6.18  | 0.333       | 39         | A_10 A_100 A_104 A_11 A_14<br>A_15 A_18 A_7 A_79 A_82<br>A_83 A_96 A_97                                                                                                                 |

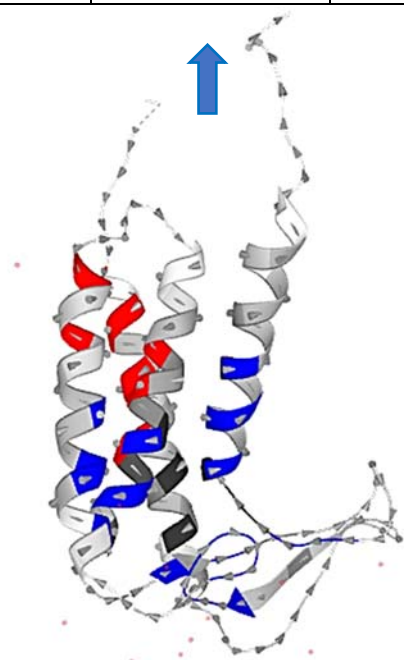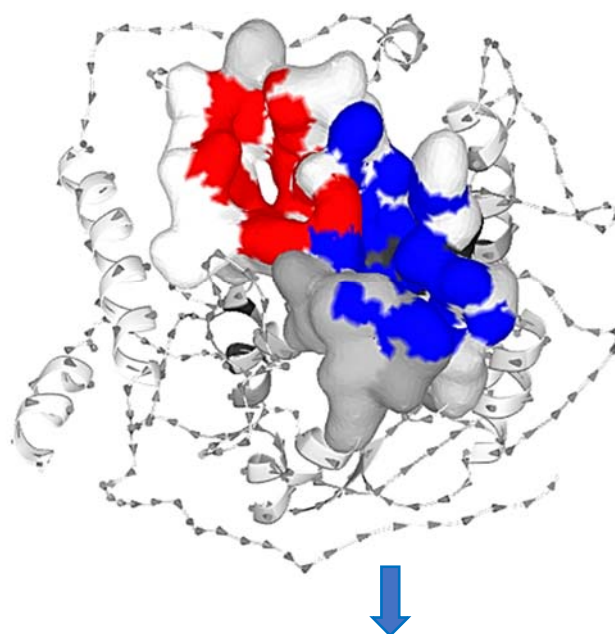

| 2W5Q    | rank | score | probability | sas_points | surf_atoms | residue_ids                                                                                                             |
|---------|------|-------|-------------|------------|------------|-------------------------------------------------------------------------------------------------------------------------|
| pocket1 | 1    | 25.63 | 0.888       | 95         | 41         | A_255 A_256 A_298 A_299 A_300 A_301 A_347<br>A_349 A_353 A_354 A_356 A_384 A_413 A_416<br>A_417 A_476 A_477 A_478 A_480 |
| pocket2 | 2    | 6.26  | 0.338       | 65         | 36         | A_293 A_294 A_295 A_296 A_299 A_477 A_481<br>A_497 A_500 A_501 A_504 A_562 A_563 A_564<br>A_566 A_575                   |



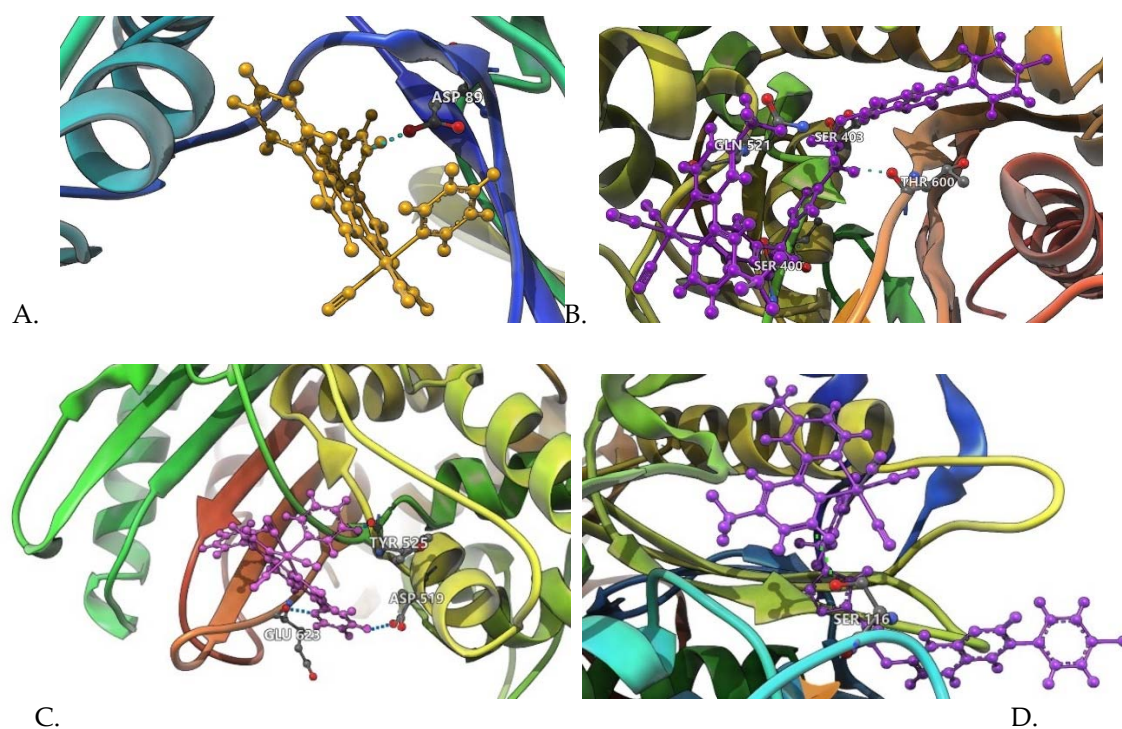

**Figure S12a.** Binding orientation of the compounds with hydrogen-acceptor and hydrogen-donor distances: A. **15** and PBP2: 2OLV ; B. **19** and PBP2a: 4DKI ; C. **15** and PBP3: 3VSL; D. **19** and PBP4: 5TXI.

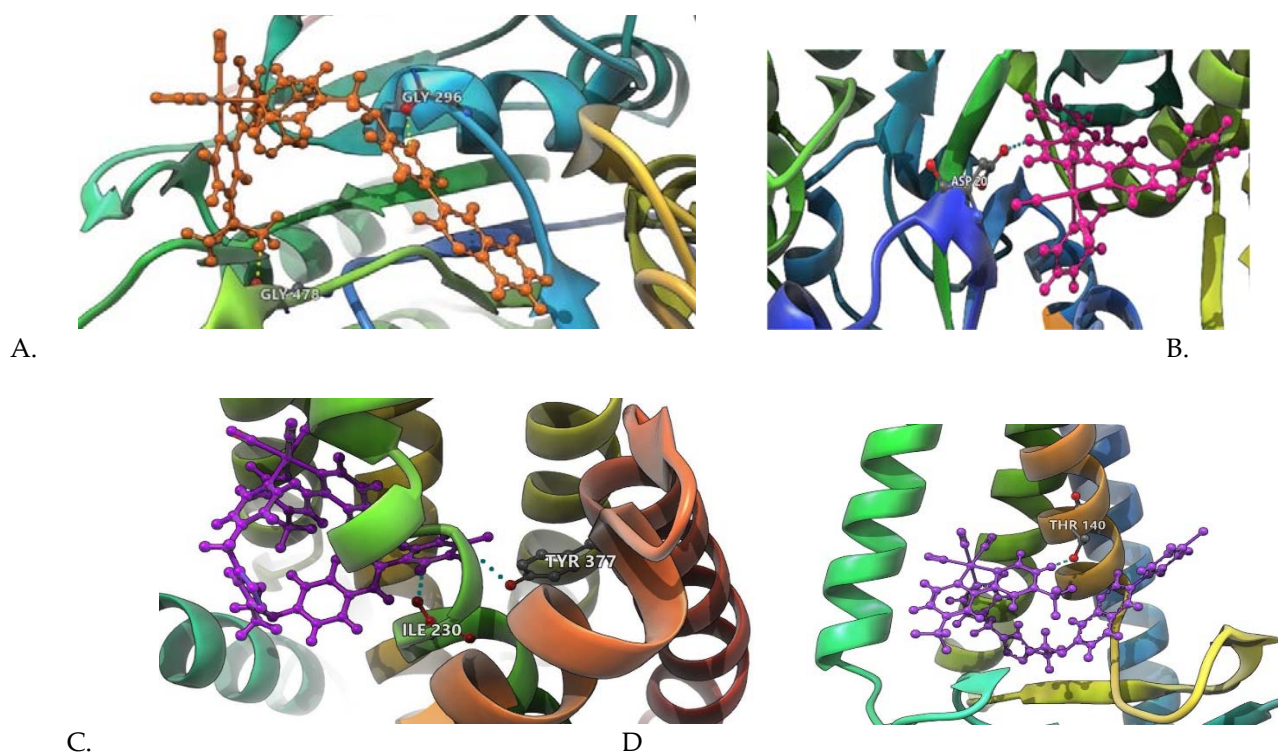

**Figure S12b.** Binding orientation of the compounds with hydrogen-acceptor and hydrogen-donor distances: A. **18** and Lipoteichoic acids synthase (LtaS): 2W5Q; B. **15** and Type-I signal peptidase (SpsB): 4WVJ; C. **19** and Lipoteichoic acids flippase (LtaA): 6S7V; D. **19** and Lipoprotein signal peptidase II (LspA): 6RYP.

**Table S3.** Percentage distribution of the surrounding residue types for the two groups of protein.

[illegible][illegible]

Table S4a Selected Bond Lengths for *cis*-3a.

AtomAtomLength/Å

|     |     |           |
|-----|-----|-----------|
| Re1 | Br1 | 2.606(2)  |
| Re1 | N1  | 2.197(10) |
| Re1 | N2  | 2.103(12) |
| Re1 | N3  | 2.188(14) |
| Re1 | C15 | 2.00(2)   |
| Re1 | C16 | 1.902(19) |
| O1  | C15 | 0.93(2)   |
| O2  | C16 | 1.15(2)   |

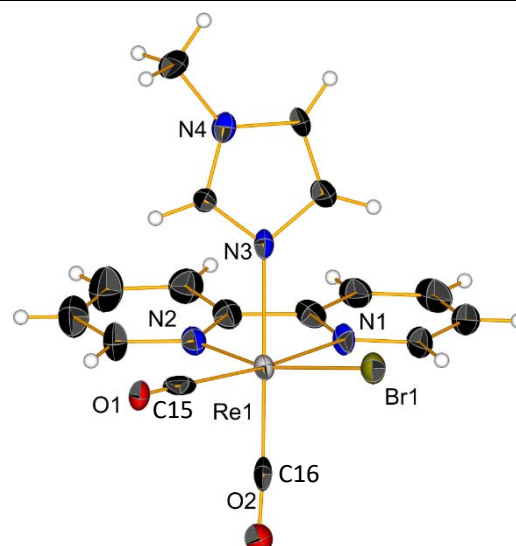Table S4a' Selected Bond Angles for *cis*-3a.

| AtomAtomAtomAngle/° | AtomAtomAtomAngle/° | AtomAtomAtomAngle/° |
|---------------------|---------------------|---------------------|
| N1 Re1 Br1 91.8(3)  | N2 Re1 Br1 163.9(3) | C16 Re1 Br1 96.5(5) |
| N2 Re1 N1 75.6(4)   | N2 Re1 N3 83.1(5)   | C16 Re1 N1 96.1(6)  |
| N3 Re1 Br1 85.4(3)  | N3 Re1 N1 82.6(4)   | C16 Re1 N2 94.8(6)  |
| C15 Re1 Br1 96.0(4) | C15 Re1 N1 171.3(5) | C16 Re1 N3 177.8(7) |
| C15 Re1 N2 96.0(5)  | C15 Re1 N3 94.3(5)  | C16 Re1 C15 86.7(6) |

Table S4b Selected Bond Lengths for 4a.

AtomAtomLength/Å

|     |     |          |
|-----|-----|----------|
| Re1 | N1  | 2.181(5) |
| Re1 | N2  | 2.183(5) |
| Re1 | N3  | 2.175(5) |
| Re1 | N4  | 2.165(5) |
| Re1 | C21 | 1.876(7) |
| Re1 | C22 | 1.880(7) |
| O1  | C21 | 1.174(8) |
| O2  | C22 | 1.169(8) |

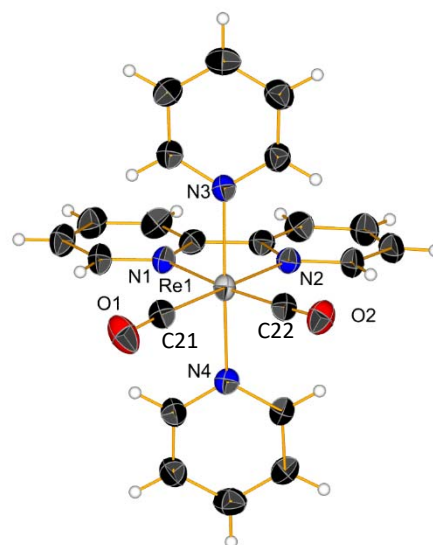

Table S4b' Selected Bond Angles for 4a.

| AtomAtomAtomAngle/° | AtomAtomAtomAngle/°  | AtomAtomAtomAngle/° |
|---------------------|----------------------|---------------------|
| N1 Re1 N2 74.26(19) | N3 Re1 N1 86.65(19)  | C21 Re1 N4 90.1(2)  |
| N3 Re1 N2 87.05(19) | N4 Re1 N2 85.66(19)  | C22 Re1 N3 91.4(2)  |
| N4 Re1 N1 87.12(19) | N4 Re1 N3 171.46(19) | C22 Re1 N1 173.8(2) |
| C21 Re1 N1 99.1(2)  | C21 Re1 N3 96.6(2)   | C22 Re1 N4 94.2(2)  |
| C21 Re1 N2 172.2(2) | C21 Re1 C22 87.1(3)  | C22 Re1 N2 99.7(2)  |

Table S4c Selected Bond Lengths for **11**.

AtomAtomLength/Å

Re1 Br1 2.5117(5)

Re1 Br2 2.5199(4)

Re1 N1 2.154(3)

Re1 N2 2.150(3)

Re1 C25 1.987(5)

Re1 C26 1.957(5)

O1 C25 1.087(5)

O2 C26 1.077(5)

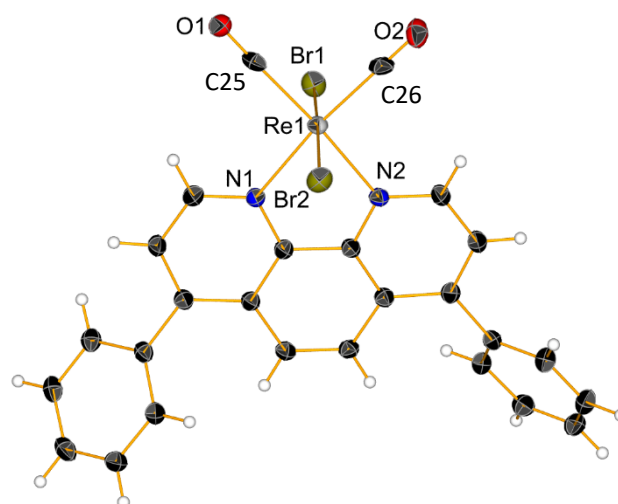Table S4c' Selected Bond Angles for **11**.

AtomAtomAtomAngle/°

Br1 Re1 Br2 172.749(18)

N1 Re1 Br2 87.63(8)

N2 Re1 Br2 87.29(8)

C25 Re1 Br1 88.49(12)

C25 Re1 N1 98.86(14)

AtomAtomAtomAngle/°

N1 Re1 Br1 86.11(8)

N2 Re1 Br1 87.62(8)

N2 Re1 N1 75.69(11)

C25 Re1 Br2 96.09(12)

C25 Re1 N2 173.51(14)

AtomAtomAtomAngle/°

C26 Re1 Br1 94.61(13)

C26 Re1 Br2 91.21(13)

C26 Re1 N1 173.63(14)

C26 Re1 N2 98.00(14)

C26 Re1 C25 87.49(16)

Table S4d Selected Bond Lengths for **6**.

AtomAtomLength/Å

Re1 Br1 2.6115(7)

Re1 N1 2.169(4)

Re1 N2 2.177(5)

Re1 C19 1.940(6)

Re1 C20 1.929(5)

Re1 C21 1.986(7)

O1 C19 1.125(7)

O2 C20 1.138(7)

O3 C21 1.061(7)

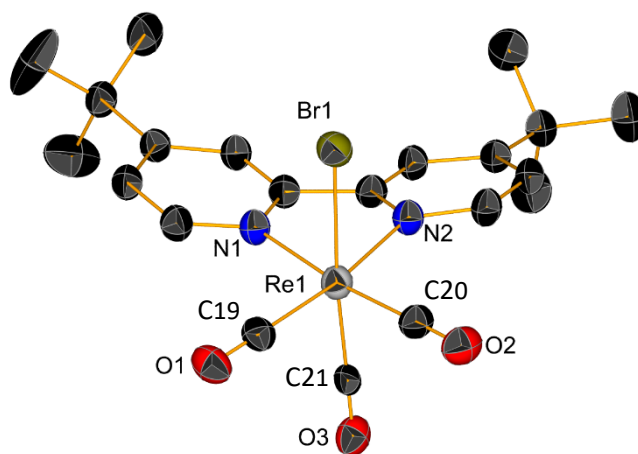Table S4d' Selected Bond Angles for **6**.

AtomAtomAtomAngle/°

N1 Re1 Br1 86.09(12)

N2 Re1 Br1 84.23(12)

C19 Re1 N1 96.6(2)

C19 Re1 C21 89.9(2)

C20 Re1 N1 174.1(2)

AtomAtomAtomAngle/°

N1 Re1 N2 73.84(16)

C19 Re1 Br1 95.54(17)

C19 Re1 N2 170.5(2)

C20 Re1 Br1 89.84(17)

C20 Re1 N2 101.5(2)

AtomAtomAtomAngle/°

C20 Re1 C19 88.0(2)

C20 Re1 C21 89.6(2)

C21 Re1 Br1 174.51(15)

C21 Re1 N2 90.5(2)

C21 Re1 N1 94.09(19)



Table S4e Selected Bond Lengths for 7.

AtomAtomLength/Å

|     |     |           |
|-----|-----|-----------|
| Re1 | Br1 | 2.605(2)  |
| Re1 | N1  | 2.145(17) |
| Re1 | N2  | 2.148(15) |
| Re1 | C13 | 1.93(2)   |
| Re1 | C14 | 1.917(18) |
| Re1 | C15 | 2.01(2)   |
| O1  | C13 | 1.12(2)   |
| O2  | C14 | 1.15(2)   |
| O3  | C15 | 1.03(2)   |

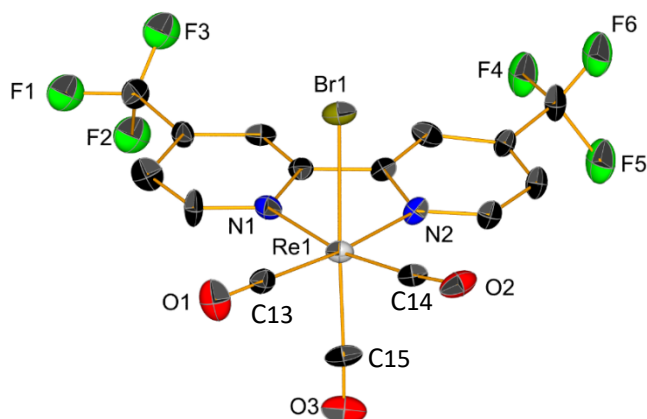

Table S4e' Selected Bond Angles for 7.

| AtomAtomAtomAngle/° |     |     |          | AtomAtomAtomAngle/° |     |     |          | AtomAtomAtomAngle/° |     |     |          |
|---------------------|-----|-----|----------|---------------------|-----|-----|----------|---------------------|-----|-----|----------|
| N1                  | Re1 | Br1 | 83.2(4)  | N1                  | Re1 | N2  | 75.6(6)  | C14                 | Re1 | C13 | 88.5(8)  |
| N2                  | Re1 | Br1 | 84.7(4)  | C13                 | Re1 | Br1 | 92.8(6)  | C14                 | Re1 | C15 | 92.2(8)  |
| C13                 | Re1 | N1  | 97.8(7)  | C13                 | Re1 | N2  | 173.1(7) | C15                 | Re1 | Br1 | 176.2(6) |
| C13                 | Re1 | C15 | 90.9(8)  | C14                 | Re1 | Br1 | 89.0(5)  | C15                 | Re1 | N1  | 95.3(7)  |
| C14                 | Re1 | N1  | 170.2(7) | C14                 | Re1 | N2  | 97.8(7)  | C15                 | Re1 | N2  | 91.6(7)  |

Table S4f Selected Bond Lengths for 8.

AtomAtomLength/Å

|     |                  |           |
|-----|------------------|-----------|
| Re1 | Br1              | 2.6307(6) |
| Re1 | N1               | 2.162(3)  |
| Re1 | N1 <sup>1</sup>  | 2.162(3)  |
| Re1 | C10              | 1.912(5)  |
| Re1 | C10 <sup>1</sup> | 1.912(5)  |
| Re1 | C11              | 1.940(7)  |
| O1  | C10              | 1.158(6)  |
| O2  | C11              | 1.074(7)  |

<sup>1</sup>+X,+Y,3/2-Z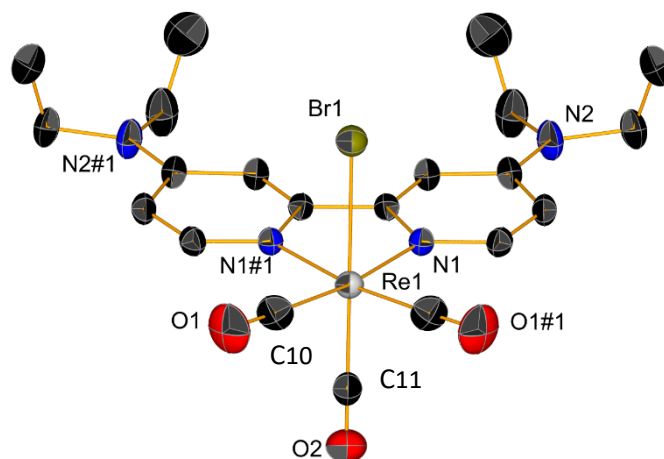

Table S4f' Selected Bond Angles for 8.

| AtomAtomAtomAngle/° |     |                 |            | AtomAtomAtomAngle/° |     |                  |           | AtomAtomAtomAngle/° |     |                 |            |
|---------------------|-----|-----------------|------------|---------------------|-----|------------------|-----------|---------------------|-----|-----------------|------------|
| N1 <sup>1</sup>     | Re1 | Br1             | 84.59(8)   | N1                  | Re1 | Br1              | 84.59(8)  | C10 <sup>1</sup>    | Re1 | C11             | 90.7(2)    |
| N1                  | Re1 | N1 <sup>1</sup> | 74.49(15)  | C10 <sup>1</sup>    | Re1 | Br1              | 91.37(16) | C10                 | Re1 | C11             | 90.7(2)    |
| C10                 | Re1 | Br1             | 91.37(16)  | C10                 | Re1 | N1 <sup>1</sup>  | 98.41(17) | C11                 | Re1 | Br1             | 177.06(17) |
| C10 <sup>1</sup>    | Re1 | N1 <sup>1</sup> | 172.10(16) | C10 <sup>1</sup>    | Re1 | N1               | 98.41(17) | C11                 | Re1 | N1              | 93.08(16)  |
| C10                 | Re1 | N1              | 172.10(16) | C10                 | Re1 | C10 <sup>1</sup> | 88.4(3)   | C11                 | Re1 | N1 <sup>1</sup> | 93.08(16)  |

<sup>1</sup>+X,+Y,3/2-Z

Table S4g Selected Bond Lengths for **10**.

AtomAtomLength/Å

Re1 Br1 2.6162(7)

Re1 Br2A 2.473(15)

Re1 N1 2.158(5)

Re1 N2 2.171(4)

Re1 C25 1.904(6)

Re1 C26 1.934(6)

Re1 C27 1.885(13)

O1 C25 1.164(8)

O2 C26 1.148(7)

O3 C27 1.189(19)

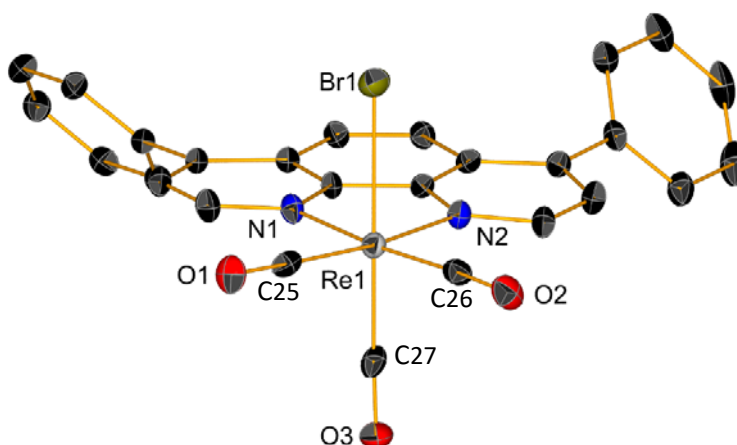Table S4g' Selected Bond Angles for **10**.

AtomAtomAtomAngle/°

N1 Re1 Br1 83.46(14)

N1 Re1 N2 75.19(17)

N2 Re1 Br1 85.69(12)

C25 Re1 Br1 91.32(17)

C25 Re1 N1 96.9(2)

AtomAtomAtomAngle/°

C25 Re1 N2 171.8(2)

C26 Re1 Br1 94.49(17)

C26 Re1 N2 98.4(2)

C27 Re1 N2 93.1(3)

C27 Re1 C26 86.6(3)

AtomAtomAtomAngle/°

C25 Re1 C26 89.4(2)

C27 Re1 C25 89.8(3)

C26 Re1 N1 173.4(2)

C27 Re1 N1 95.3(3)

C27 Re1 Br1 178.4(3)

Table S4h Selected Bond Lengths for *cis*-**11**.

AtomAtomLength/Å

Re1 Br1 2.5533(8)

Re1 Br3 2.466(12)

Re1 N1 2.159(5)

Re1 N2 2.163(5)

Re1 C25 1.973(7)

Re1 C27 1.968(18)

O1 C25 1.063(8)

O3 C27 1.092(18)

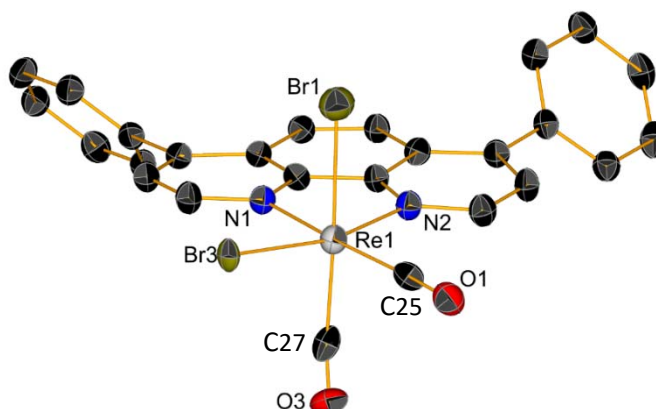Table S4h' Selected Bond Angles for *cis*-**11**.

AtomAtomAtomAngle/°

Br3 Re1 Br1 86.5(4)

N1 Re1 N2 75.15(17)

N2 Re1 Br1 86.15(13)

C25 Re1 Br3 94.7(4)

C25 Re1 N2 97.7(2)

AtomAtomAtomAngle/°

N1 Re1 Br1 85.24(13)

N1 Re1 Br3 92.6(3)

N2 Re1 Br3 166.2(4)

C25 Re1 Br1 96.45(18)

C25 Re1 N1 172.6(2)

AtomAtomAtomAngle/°

C27 Re1 N1 93.0(6)

C27 Re1 Br1 177.5(6)

C27 Re1 C25 85.5(6)

C27 Re1 N2 95.1(6)

Table S4i Selected Bond Lengths for *mer-12*.

AtomAtomLength/Å

|     |     |           |
|-----|-----|-----------|
| Re1 | Br1 | 2.5533(8) |
| Re1 | Br2 | 2.479(3)  |
| Re1 | Br3 | 2.466(12) |
| Re1 | N1  | 2.159(5)  |
| Re1 | N2  | 2.163(5)  |
| Re1 | C25 | 1.973(7)  |
| O1  | C25 | 1.063(8)  |

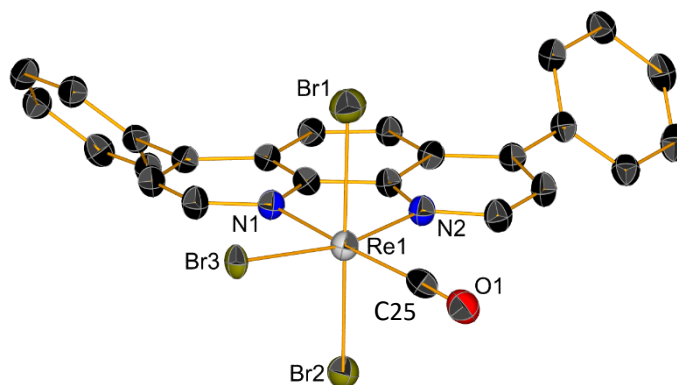Table S4i' Selected Bond Angles for *mer-12*.

| AtomAtomAtomAngle/°   | AtomAtomAtomAngle/°  | AtomAtomAtomAngle/°   |
|-----------------------|----------------------|-----------------------|
| Br2 Re1 Br1 170.34(6) | Br3 Re1 Br1 86.5(4)  | C25 Re1 Br1 96.45(18) |
| N1 Re1 Br1 85.24(13)  | N1 Re1 Br2 87.41(14) | C25 Re1 N2 97.7(2)    |
| N1 Re1 Br3 92.6(3)    | N1 Re1 N2 75.15(17)  | C25 Re1 Br2 90.07(19) |
| N2 Re1 Br1 86.15(13)  | N2 Re1 Br2 85.92(14) | C25 Re1 N1 172.6(2)   |
| N2 Re1 Br3 166.2(4)   | C25 Re1 Br3 94.7(4)  |                       |

## References

1. Richter, S.G.; Elli, D.; Kim, H.K.; Hendrickx, A.P.; Sorg, J.A.; Schneewind, O.; Missiakas, D. Small molecule inhibitor of lipoteichoic acid synthesis is an antibiotic for Gram-positive bacteria. *Proc. Natl. Acad. Sci. USA* **2013**, *110*, 3531–3536, doi:10.1073/pnas.1217337110.
2. Craney, A.; Romesberg, F.E. The inhibition of type I bacterial signal peptidase: Biological consequences and therapeutic potential. *Bioorg. Med. Chem. Lett.* **2015**, *25*, 4761–4766, doi:10.1016/j.bmcl.2015.07.072.
3. Olatunji, S.; Yu, X.; Bailey, J.; Huang, C.Y.; Zapotoczna, M.; Bowen, K.; Remskar, M.; Muller, R.; Scanlan, E.M.; Geoghegan, J.A., et al. Structures of lipoprotein signal peptidase II from *Staphylococcus aureus* complexed with antibiotics globomycin and myxovirescin. *Nat. Commun.* **2020**, *11*, 140, doi:10.1038/s41467-019-13724-y.
4. Hebditch, M.; Warwicker, J. Web-based display of protein surface and pH-dependent properties for assessing the developability of biotherapeutics. *Sci. Rep.* **2019**, *9*, 1969, doi:10.1038/s41598-018-36950-8.
5. Warwicker, J. Continuum dielectric modelling of the protein-solvent system, and calculation of the long-range electrostatic field of the enzyme phosphoglycerate mutase. *J. Theor. Biol.* **1986**, *121*, 199–210, doi:10.1016/s0022-5193(86)80093-5.
